# 1 Access to Scientific Literature by the Conservation 2 Community

3 Daisy Larios<sup>1</sup>, Thomas M. Brooks<sup>1</sup>, Nicholas B.W. Macfarlane<sup>2</sup>, Sugoto Roy<sup>3</sup>

4 <sup>1</sup> Science and Knowledge Unit, International Union for Conservation of Nature (IUCN), Gland, Vaud, Switzerland

5 <sup>2</sup> Science and Knowledge Unit, International Union for Conservation of Nature (IUCN), Washington D.C., United  
6 States of America

7 <sup>3</sup> Global Species & Key Biodiversity Areas Programme, International Union for Conservation of Nature (IUCN),  
8 Gland, Vaud, Switzerland

9 Corresponding Author:

10 Daisy Larios<sup>1</sup>

11 Email address: [daisy.larios@iucn.org](mailto:daisy.larios@iucn.org)

## 12 Abstract

13  
14 Access to the scientific literature is perceived to be a challenge to the biodiversity conservation  
15 community, but actual level of literature access relative to needs has never been assessed  
16 globally. We examined this question by surveying the constituency of the International Union for  
17 Conservation of Nature (IUCN) as a proxy for the conservation community, generating 2,285  
18 responses. Of these respondents, ~97% need to use the scientific literature in order to support  
19 their IUCN-related conservation work, with ~50% needing to do so at least once per week. The  
20 crux of the survey revolved around the question, “How easy is it for you currently to obtain the  
21 scientific literature you need to carry out your IUCN-related work?” and revealed that roughly  
22 half (49%) of the respondents find it *not easy* or *not at all easy* to access scientific literature. We  
23 fitted a binary logistic regression model to explore factors predicting ease of literature access.  
24 Whether the respondent had institutional literature access (55% do) is the strongest predictor,  
25 with region (Western Europe, the United States, Canada, Australia and New Zealand) and gender  
26 (male) also significant predictors. Approximately 60% of respondents from Western Europe, the  
27 United States, Canada, Australia and New Zealand have institutional access compared to ~50%  
28 in Asia and Latin America, and ~40% in Eastern Europe and in Africa. Nevertheless, accessing  
29 free online material is a popular means of accessing literature for both those with and without  
30 institutional access. The four journals most frequently mentioned when asked which journal  
31 access would deliver the greatest improvements to the respondent’s IUCN-related work were  
32 *Conservation Biology*, *Biological Conservation*, *Nature*, and *Science*. The majority prefer to read  
33 journal articles on screen but prefer to read books in hard copy. Overall, it is apparent that access  
34 to the literature is a challenge facing roughly half of the conservation community worldwide.

## 35 Introduction

36

37 A commonly held belief through the conservation community is that lack of access to the  
38 scientific literature is a limiting factor for practitioners (Fonseca & Benson, 2003;  
39 Rafidimanantsoa et al, 2018; Amano et al., 2016). This assumption stands to reason given the  
40 evidence that access to information would improve conservation outcomes (Cook et al., 2010;  
41 Walsh et al., 2015) as well as the documentation of shortfalls in literature access from other  
42 fields of applied science (Horton, 2000, Godlee et al., 2004). This creates a challenge for  
43 conservation, especially given that there appears to be an inverse relationship between where  
44 research takes place and where it is most needed (Rodrigues et al., 2010; Wilson et al., 2016).  
45 Meanwhile, library science literature has generally focused its studies on the information needs  
46 and behaviours of scientists and scholars, only more recently expanding its scope to consider the  
47 needs of nonacademic professionals (Leckie et al., 1996). For conservation, previous studies  
48 have found that those in sectors other than academia and government experience the most  
49 difficulty in finding the biodiversity information they need to do their work (Steiner Davis et al.,  
50 2014; Fabian et al., 2019). Despite some evidence that scientific journals do not contain the type  
51 of information considered most important by conservation professionals (Roy, Smith & Russell,  
52 2009; Fabian et al., 2019), the degree to which access to the scientific literature meets the stated  
53 needs of the global community has never been assessed, and little consideration has been given  
54 to the role of libraries in facilitating access to literature.

55

56 Existing models of information seeking tend to focus on specific professionals or academic  
57 groups, but biodiversity conservation is undertaken by a web of actors that goes beyond  
58 scientists and academics to include on-the-ground practitioners as well as employees of NGOs  
59 and governments. We therefore surveyed the constituency of the International Union for the  
60 Conservation of Nature (IUCN) to determine the extent of literature access from among the  
61 world's conservation professionals and to which their institution facilitates access to literature.

62

63 Created in 1948, IUCN is a Membership Union uniquely composed of both governments and  
64 state agencies (223 in total) and civil society and indigenous peoples' organisations (1,117 in  
65 total), with each of these two houses having equal weight in the Union's governance. Members  
66 approve the mandates of expert Commissions, of which there are currently six, encompassing  
67 some 13,000 experts who lend their expertise to IUCN. The Members also elect a Council that  
68 appoints a Director-General, who in turn recruits a professional Secretariat, comprising roughly  
69 1,000 employees. Given this breadth of IUCN's makeup, respondents to our survey could have a  
70 variety of backgrounds and roles: from environmental practitioners, nonprofit workers, and  
71 governmental decision makers to academics and consultants. Here, we refer to this complex  
72 group of survey respondents as "conservation professionals" for simplicity's sake, even though it  
73 could include respondents who work within environmental organizations in financial,

74 administrative, or legal capacities and could exclude conservation professionals working in  
75 organizations whose focus is not conservation (e.g. watershed councils and city governments).

76

77 IUCN has always served a role in supporting access to conservation knowledge and literature, a  
78 role historically held to be critical to supporting the goals of conservation. When it was founded  
79 in Fontainebleau on 5 October 1948 as the International Union for the Protection of Nature  
80 (IUPN), one of its original objectives was to “collect, analyse, interpret and disseminate  
81 information about the ‘Protection of Nature’” (Büttikofer, 1946). It regarded the International  
82 Office for the Protection of Nature, one of its founding international organisational members, as  
83 essential in carrying out this objective (IUCN, 1951). The Office’s predecessor, the Central  
84 Bureau of Information and Correlation, was founded at the 1928 General Assembly of the  
85 International Union of Biological Sciences by the National Committees of Belgium, France and  
86 Holland, who saw the Bureau as an important step towards the ultimate goal of creating an  
87 international union (Büttikofer, 1947). Organisations dedicated to the protection of nature were  
88 to send publications to the Bureau to facilitate the later establishment of this international union  
89 (Büttikofer, 1946). The Bureau was replaced by the International Office for the Protection of  
90 Nature in December 1935 and transferred to Amsterdam in 1940 at the outbreak of World War  
91 II, which severely limited the Office’s finances. By 1947, though, it had been modestly re-  
92 established as a “scientific institution, a library, a record-office, a centre for receiving,  
93 classifying and publishing data, for organizing inquiries, for propaganda and information”  
94 (Büttikofer, 1947). The Office finally merged with IUPN in 1955, taking the name of the  
95 Office’s founder: Bibliothèque van Tienhoven. The IUCN HQ Library over the years has built  
96 upon the original collection inherited from the Office.

97

98 We intend for the results of this survey to have immediate practical implications. Most directly,  
99 our results will steer the strategy for IUCN and other conservation organisations in strengthening  
100 their institutional commitment to their own libraries. Second, they should also provide useful  
101 insight for conservation libraries housed throughout the IUCN Membership. Equally, actors in  
102 the complex publishing landscape of conservation research – involving commercial publishers,  
103 non-profit publishers, universities, academics and conservation organisations under a number of  
104 arrangements – may be able to draw from our findings to enhance their readerships and impact.  
105 Finally, our results may be valuable to foundations and other funding agencies that support  
106 conservation, in seeking to optimise their investments.

107

## 108 Materials and Methods

109

110 The survey consisted of fifteen questions divided over four pages (Supplementary Online  
111 Material). References to “scientific literature” throughout the survey were defined as “peer-  
112 reviewed scientific journals plus technical books” in the introductory text to the survey. We

113 define “institutional access to scientific literature online” to mean that the respondent’s employer  
114 or some other institution to which they have an affiliation (e.g. a university) has a library or  
115 library-like department that negotiates online subscriptions to journals or databases on behalf of  
116 the institution’s users. We did not use the word “library” because users may strictly associate  
117 libraries with a physical space, unaware that access to journals or databases (often seamlessly  
118 authorized by IP address) is facilitated by the institution’s library (Tenopir, Christian &  
119 Kaufman, 2019). A library does not necessarily have to be in a physical space, as can be seen in  
120 the definition proposed by the American Library Association: “A library is a collection of  
121 resources in a variety of formats that is 1) organized by information professionals or other  
122 experts who 2) provide convenient physical, digital, bibliographic, or intellectual access and 3)  
123 offer targeted services and programs 4) with the mission of educating, informing, or entertaining  
124 a variety of audiences 5) and the goal of stimulating individual learning and advancing society as  
125 a whole” (American Library Association). We made reference throughout the survey to access to  
126 scientific literature for the purposes of “IUCN-related work”, given the scope of the IUCN HQ  
127 Library.

128  
129 The survey’s first page collected demographic information about the respondent, with a fourth  
130 question asking how frequently the respondent perceived that they should be consulting scientific  
131 literature to carry out their IUCN-related work. We utilized the word “should” to distinguish  
132 between actual and required use of literature, since actual use could be suppressed due to lack of  
133 access. Results for the remaining questions only include those of respondents who required  
134 scientific literature in the course of their IUCN-related work; those who answered “Never” to  
135 this question were taken to the final page of the survey. The second page used multiple-choice  
136 questions to determine the ease and importance of the respondent’s access to the literature; asked  
137 which one journal would have the largest impact on the respondent’s work were they to have  
138 access; and explored preferred reading formats, whether the respondent has institutional access  
139 to the literature, and frequency of different methods of literature access. The survey logic was  
140 designed so that those who reported no institutional access were taken to a third page, which  
141 asked respondents to assess likely frequency and impact of use were they to have such access.  
142 The final page offered respondents the opportunity to leave comments and contact details.

143  
144 The survey was made available in all three official IUCN languages (Spanish, French, English)  
145 via an email on 19 July 2016 to (i) primary contacts for all IUCN Member organizations, who  
146 were asked to forward the message to those individuals undertaking IUCN-related work within  
147 their institution, (ii) all IUCN Secretariat staff, and (iii) all members of the six IUCN  
148 Commissions for 2013–2016. These categories are non-exclusive: an individual could be a  
149 member of more than one Commission, or could simultaneously be a Commission member and  
150 an employee of a Member organization or of the IUCN Secretariat. Membership sizes of the  
151 Commissions vary, with most having ~1,000 members and the Species Survival Commission  
152 having ~10,000 members. The language in which the survey was sent was determined by

153 whether the contact had an indicated language of preference in IUCN's customer relationship  
154 management (CRM) system; those without a preference received the English-language version  
155 by default. We sought to be inclusive of all who had any need for scientific literature in their  
156 IUCN-related work and did not seek to limit the survey to those of particular roles or  
157 backgrounds. Therefore, our survey results likely include some responses from individuals who  
158 work in areas other than biodiversity conservation and require other types of literature e.g. legal  
159 or management literature. We sent a reminder on 10 August 2016 and the survey was closed on  
160 12 August 2016. The survey was wholly voluntary.

161  
162 We aggregated results by country according to the UN regional groups—Africa, Asia-Pacific,  
163 Eastern Europe, Latin America and the Caribbean, and Western Europe and Others (which  
164 includes the United States, Canada, Australia and New Zealand). While a range of other national  
165 socio-economic parameters (e.g. GDP, income equality, education of girls and boys) could be  
166 included, we chose to select these regional groupings to reflect political and social as well as  
167 economic similarities in as small a number of groups as possible, in a way informative for  
168 decision-making in conservation, libraries, and other relevant institutions.

169  
170 To compare the relationship between a respondent's answers to the demographic and  
171 professional questions on their perception of ease of access to necessary literature, we modeled  
172 ease of access by condensing responses to the ease of access question into a binary variable (very  
173 hard + hard = 0, easy + very easy = 1) and fitting a binary logistic regression model to the full  
174 rank dataset of 1,970 respondents who answered all questions under consideration in the model.  
175 We began with consideration of five variables suspected likely to influence ease of literature  
176 access: institutional access [yes/no], institutional affiliation [five categories], discipline as  
177 reflected by Commission membership [six non-exclusive categories], gender [two categories],  
178 and region [five categories]. Language was not included as a factor given the relatively low  
179 number of responses in Spanish and French compared to English; however, responses from all  
180 three language variations of the survey were included in the model. Standard variable selection  
181 approaches based on AIC scores (Akaike, 1974), resulted in a final model of the probability of  
182 access being easy as a function of Region (as compared to a base case region of Africa), Gender  
183 ("male" compared to "female"), and Institutional Access ("yes" compared to "no") (Table 1).  
184 The base case of Africa, female, and no institutional access was chosen for comparison because  
185 those respondents reported the most difficult access. Institutional affiliation and Commission  
186 membership did not emerge as significant predictors in the model. In addition, interactions were  
187 explored between gender and region, and gender and institutional access, neither of which were  
188 significant. There was some evidence for an interaction between institutional access and being in  
189 the Western Europe and Others Group, which did not change the overall conclusions and was not  
190 included given the principles of parsimony and statistical efficiency, and the complexities of  
191 interpreting interaction terms in non-linear models (Ai & Norton, 2003). All model fitting was  
192 conducted using R (R Development Core team, 2017)

193

## 194 Results

195

196 In total, we received 2,285 responses to our survey. This represents 11% of the IUCN  
197 constituency to whom the survey was directly distributed, although it is difficult to give a precise  
198 return rate given that the actual number of potential participants is unknown. Anecdotal email  
199 responses suggest that some Member focal points erroneously thought the survey should be filled  
200 out on behalf of the entire organization. Also, our results will be biased against those who did not  
201 have internet access during the time of survey (who are in turn likely to have poor access to the  
202 scientific literature in the first place). Nearly all (87%) responses were to the English-language  
203 version, and the vast majority (97%) of respondents felt they should be accessing scientific  
204 literature at least once per month (Figure 1).

205

206 How easily can the conservation community access scientific literature?

207

208 The survey revolved around the question, “How easy is it for you currently to obtain the  
209 scientific literature you need to carry out your IUCN-related work?” Roughly half (49%) of all  
210 2,004 respondents to this question find it *not easy* or *not at all easy* to access scientific literature  
211 (Figure 2).

212

213 Overall, 47% of the 2,004 respondents to the question reported having no institutional access to  
214 scientific literature online, which correlates greatly to ease of access to literature. Among those  
215 with online institutional access, 72% found it easy to obtain access to required literature. By  
216 contrast, a similar percentage (74%) of those reporting no institutional access found it difficult to  
217 access scientific literature (Figure 3).

218

219 Not surprisingly, then, institutional access was the primary explanatory variable predicting ease  
220 of access. Exponentiating the model coefficient shows that institutional access increased the odds  
221 of easy access to literature by a factor of 6.86; it would seem that affiliation with an institution  
222 with a library greatly increases the odds of easy access to scientific literature. Being male and  
223 being based in the Western Europe and Others Group were also significant predictors of ease of  
224 access.

225

226 Respondents to our survey were based in 170 countries, allowing us to examine variation across  
227 the five United Nations regional socio-geographical groupings. Nearly half of respondents  
228 belonged to the Western Europe and Others Group (Figure 4). The two socio-geographic areas  
229 with the greatest difficulty in obtaining scientific literature were Africa and Eastern Europe, with  
230 63% of respondents from Africa and 57% of respondents from Eastern Europe reporting that



231 accessing scientific literature as *not easy* or *not at all easy* (Figure 5). Not surprisingly, these two  
232 regions also reported the least online institutional access to scientific literature (Figure 6). This  
233 supports our model findings that being based in a country in the Western Europe and Others  
234 group as opposed to one in Africa increased the odds of easy access by a factor of 1.73, as shown  
235 by exponentiating the region coefficient. Other regions were not significant predictors. A  
236 Tukey's post hoc test showed regional differences between Africa and Western Europe and  
237 Others ( $p = 0.005$ ), but no significant differences between all other pairwise combinations of  
238 regions.

239  
240 More than twice as many men (1,556 respondents) as women (710 respondents) took the survey.  
241 Of the 604 female respondents to the question about institutional access, 52% reported having  
242 institutional access, compared to 54% of the 1,387 male respondents to this question. When all  
243 other factors were held constant, our final model predicts that men have higher odds of easy  
244 access than women, at an odds ratio of 1.38. Interactions between gender, region, and  
245 institutional access were not significant, so there is not strong evidence for co-variation between  
246 gender and other variables in the model. However, the number of male and female respondents  
247 could potentially impact the interpretation of the gender effect if they don't appropriately reflect  
248 the population.

249  
250 Overall, 1,738 of our survey respondents reported being a member of one (or more) of IUCN's  
251 six expert Commissions. By taking Commission membership as a proxy for discipline  
252 specialisation, we examined variation across thematic issues in conservation. (This approach  
253 excludes the 453 respondents who do not belong to any Commission). Numbers of responses  
254 mirrored the size of each of the six Commissions. Overall, membership in a particular  
255 Commission did not emerge as a significant predictor of ease of access in our model.  
256 Institutional access to the scientific literature did vary though, from 60% among those whose  
257 specialisation includes environmental law to 42% among those whose expertise includes  
258 protected areas (Table 2).

259  
260 Overall, 433 of all survey respondents reported being an employee of IUCN itself or an IUCN  
261 Member organization, which we used to assess variation by sector. However, as respondents as a  
262 whole were not specifically asked to identify their work sector or employer, this partial snapshot  
263 excludes the work sectors of the 1,442 respondents who identified solely as Commission  
264 members. Sector categories are non-mutually exclusive, as 34 respondents selected more than  
265 one Membership category (presumably these are individuals who have multiple institutional  
266 affiliations). Here we consider responses from the IUCN Secretariat as well as four of IUCN's  
267 Membership categories, combining responses from staff of States and of Government agencies.  
268 We do not consider Affiliates – because this non-voting category combines governments and  
269 NGOs – or Indigenous Peoples' Organisations, because this category was established subsequent  
270 to completion of our data collection in September 2016 ([WCC-2016-Res-004](#)).

271

272 While institutional affiliation did not emerge as a predictor of access, nevertheless there were  
273 differences in levels of institutional access to scientific literature. Among these sectoral groups,  
274 individuals working for states and/or government agencies reported having the best institutional  
275 access (Table 3). The lowest levels of access by far are among the IUCN Secretariat, with only  
276 28% of the staff reporting institutional access (the IUCN Library does not have an acquisitions  
277 budget). It may be that government agencies and entities are more likely than NGOs to have  
278 libraries and/or librarians to support the information needs of government workers.

279

280 How important is access to scientific literature for the conservation community?

281

282 Most respondents to our survey (regardless of institutional access) felt that easy access to  
283 scientific literature was either *essential* or *very important* to their work with IUCN (Figure 7).  
284 This supports other findings that peer-reviewed publications remain important among science  
285 researchers generally as well as among restoration practitioners and public and private land  
286 managers (Seavy & Howell, 2010; Tenopir, Christian & Kaufman, 2019).

287

288 Of the 1,458 respondents who felt it was either *very important* or *essential* to have easy access to  
289 scientific literature, 39% reported that they should be consulting scientific literature either  
290 *sometimes (once a month)* (29%) or *infrequently* (10%). Thus, there is a sizeable proportion of  
291 conservation professionals who do not need to access scientific literature on a frequent basis but  
292 for whom it is still very important to do so at least occasionally. For libraries with limited  
293 budgets, this could suggest that a pay-per-use model might be preferable to journal or database  
294 subscription models.

295

296 We sought to quantify the importance of online institutional access to scientific literature further  
297 by asking additional questions of those respondents who stated they did not have institutional  
298 access to scientific literature online. The majority of these respondents reported that the lack of  
299 institutional access to scientific literature online has a moderate to great negative impact on their  
300 IUCN-related work (Figure 8). The narrative comments on this question reveal another concern  
301 beyond the negative impact on the quality of the work: time wasted trying to find appropriate  
302 literature. For example:

303

304 • “I waste time searching for free versions of papers online. I waste time getting frustrated  
305 that I can’t find free versions for everything I need. I cut corners scientifically which I  
306 don’t like. I am not up to date professionally. I am not able to adequately pursue my own  
307 professional development.”

308 • “Time spent chasing articles from colleagues could be better spent using findings.”

309



310 The impacts of lack of access are perceived as more severe in some regions than in others.  
311 Notably, 29% of respondents from Africa reported their lack of institutional access as incurring a  
312 *great negative impact*; in Latin America and the Caribbean it was 24% and in all other regions  
313 <20%. Other variation was minimal: among sectors, lack of access is felt most keenly among  
314 those working for national NGOs (20% reporting *great negative impact*), while among  
315 disciplines it is felt most strongly by specialists in law (22%), ecosystems, and education and  
316 communication (both 21%). Among all respondents, the rate was 16%. These results can guide  
317 the efforts of funders seeking to make the greatest gains in improving access to literature for  
318 impact: for example, they suggest increased funding for conservation libraries would make  
319 particular impact within national environmental NGOs.

320  
321 Most respondents reported that obtaining institutional access would have a *moderate to great*  
322 *positive effect* on the quality of their IUCN-related work (Figure 9). Narrative comments suggest  
323 that a range of benefits would be accrued from library-facilitated access to literature online,  
324 including strengthening innovation, efficiency, and credibility:

- 325  
326 ● “Work would be more thorough, more inclusive, more efficient.”  
327 ● “No effect on quality, but direct access would speed up my work at times.”  
328 ● “It will allow me to produce better Red List assessments as well as other types of  
329 reports.”

330  
331 More than three-fifths of respondents without institutional access anticipate that they would  
332 access the literature *frequently* or *very frequently* if they did have access (Figure 10)—ten  
333 percent higher than the 51% of all 2,285 respondents who felt that they should be accessing the  
334 literature *frequently* or *very frequently*. Thus we might expect that providing library-facilitated  
335 online access to scientific literature would allow those in the conservation community to access  
336 and use literature more frequently.

337

### 338 Information pathways and preferences

339

340 We asked respondents to identify how frequently they used various means to access scientific  
341 literature; their answers shed light on the preferred (or available) pathways, both formal and  
342 informal, to scientific literature for those with and without institutional access to literature  
343 (Figure 11).

344

345 Unsurprisingly, respondents with institutional access to scientific literature reported using the  
346 library of their own institution and institutional access to literature online more frequently than  
347 those without; meanwhile, those without institutional access reported asking friends or  
348 colleagues with access to literature and using free online resources (such as Google Scholar or

349 ResearchGate) more frequently. However, accessing free online material is a popular means of  
350 accessing literature for both groups. These findings are expected, given the critical role of access  
351 in influencing information-seeking behaviour (Connaway et al., 2011) and the prevalence and  
352 necessity of informal and alternative routes of access in countries with poor access to literature,  
353 such as India (Gaulé, 2009; Boudry et al, 2019). It also reflects a previous study that found open-  
354 access literature to be the most important source of information among conservation practitioners  
355 as well as university and non-university researchers in low-middle income countries (Gossa et  
356 al., 2015). Although our survey did not attempt to specifically address the impact of websites  
357 such as Sci-Hub and LibGen that enable users to download PDFs of scholarly articles, the  
358 popularity of accessing “whatever I can find online for free” among those without and with  
359 institutional access implies that such mechanisms—despite their potential illegality—are popular  
360 even among academic researchers (Greshake, 2016; Bohannon, 2016). With freely available  
361 papers obtaining 18% more citations than expected (Piwowar et al., 2018), this method of  
362 accessing literature is becoming increasingly important.

363

364 We also asked respondents about their preferred means of reading scientific literature as well as  
365 which one journal would have the largest impact on their IUCN-related work if they could obtain  
366 access to it. Together, these questions were designed to help guide strategic decision-making for  
367 conservation libraries.

368

369 Of the 2,116 respondents to the English and French surveys, 1,238 (59%) provided answers to  
370 the question “Which one scientific journal would have the largest impact on your IUCN-related  
371 work if you could obtain easy access to it?” (this question was accidentally omitted from the  
372 Spanish survey). Of these, 794 listed specific journal names, which were classified and tallied to  
373 identify those journals to which conservationists perceive that access would benefit their work  
374 most greatly. Some respondents listed more than one journal: in such cases, scores were divided  
375 among the journals listed (e.g. if four journals were listed, these were scored 0.25 each).

376

377 In total, 235 journals were mentioned by respondents, including ten listed as most desired more  
378 than ten times. These included six specialist conservation journals (*Conservation Biology*,  
379 *Biological Conservation*, *Oryx*, *Journal of Wildlife Management*, *Biodiversity & Conservation*,  
380 and *Parks*), two general science journals (*Nature* and *Science*), one general ecological journal  
381 (*Ecology*), and one general taxonomic journal (*Zootaxa*). There is no significant relationship  
382 between the number of times that specific journals were mentioned by respondents as those to  
383 which they most desired access and the 2015 Google Scholar h5 index value of these journals  
384 (Figure 12). This mirrors results of weak or no relationships between popularity of journals with  
385 practitioners and their journal impact factors from conservation (Gossa et al., 2015) and other  
386 fields, such as surgery (Jones et al., 2006). Nevertheless, the variety of responses demonstrates  
387 the diversity of conservation community’s scientific literature needs, which suggests that a pay-

388 per-view or pay-per-article model might be more cost-effective for smaller libraries than  
389 traditional journal title or database subscriptions.

390  
391 In addition to preferred journals, conservation professionals also have different preferred reading  
392 formats between books and journal articles. To discern this difference, we asked in Question 8,  
393 “In what format do you prefer to read scientific literature?” where the choices were “I prefer  
394 reading on a screen”, “I prefer printing out to read,” and “I prefer the original hard copy.” When  
395 reading articles from scientific journals, the majority (59%) prefer reading on screen, but for  
396 books, the majority (59%) prefer to read the original hard copy. The preference for electronic  
397 journals has been noted elsewhere (Kaur, 2012).

398

## 399 Discussion

400 Our most striking findings are two-fold. First, despite the fact that 97% of respondents need it for  
401 their IUCN-related work, approximately half of the conservation community we surveyed report  
402 not having easy access to scientific literature. This stark division in ease of access to scientific  
403 literature confirms earlier findings on the difficulties of accessing literature (Cvitanoic et al.,  
404 2014; Steiner Davis et al., 2014). Second, gender, region, and, in particular, institutional access,  
405 had statistically significant effects on ease of access to scientific literature. Considering that Sci-  
406 Hub, for example, provides greater coverage than the University of Pennsylvania to “toll access”  
407 journal articles (Himmelstein, 2017), the persistent relevance of institutional access was  
408 surprising but nonetheless points to the need for continued support of institutional libraries.

409

410 Much concern has been raised about the challenges to the scientific process faced by Africa,  
411 Asia-Pacific, and Latin America and the Caribbean (Barber et al., 2014, Pasgaard & Strange,  
412 2013). This geographical variation in where conservation science is produced and published is  
413 potentially related to the geographical variation in access to the literature (Karlsson et al., 2007;  
414 Fisher, 2015; Gossa et al., 2015; Nuñez et al., 2019). An information gap as well as “digital  
415 divide” (Coloma & Harris, 2005) between lower and higher income countries has long been  
416 acknowledged, and our results confirm that the conservation community in high-income  
417 countries have greater easy access than their counterparts in the rest of the world. However, even  
418 in middle-high income countries, over 40% of our respondents report not having easy access to  
419 scientific literature online. Additionally, Eastern Europe, which had the second greatest difficulty  
420 in access to the literature, is rarely highlighted in assessments of the topic. Our finding that this  
421 information gap divides gender as well as geography is presumably both a symptom and a cause  
422 of the underrepresentation of women in science (Ceci & Williams, 2011).

423

424 One approach to addressing the issue of access has been the number of worldwide programs and  
425 initiatives designed to expand scientific access to lower income countries, such as Research4Life  
426 (Burton, 2011; Bartol et al., 2013; <http://www.research4life.org>), in which institutions in eligible

427 countries may register for free or discounted access to scientific journals. Various individual  
428 publishers, such as the University of Chicago Press (<http://www.journals.uchicago.edu/inst/ceni>)  
429 and Oxford University Press ([http://www.oxfordjournals.org/en/librarians/developing-countries-](http://www.oxfordjournals.org/en/librarians/developing-countries-initiative/)  
430 [initiative/](http://www.oxfordjournals.org/en/librarians/developing-countries-initiative/)), offer similar programs. However, there are limitations to such systems (Smith et al.,  
431 2007; Chan et al., 2011; Villafuerte-Gálvez, Curioso & Gayoso, 2007; Bendezú-Quispe et al.,  
432 2016). The factors taken into consideration to determine whether a country is eligible for  
433 Research4Life include total gross national income and the country's Human Development Index,  
434 among others, but the combination of these factors means that no countries in Eastern Europe  
435 qualify for free access under Research4Life even though Eastern European respondents to our  
436 survey reported the second-lowest rates of institutional access to conservation literature (after  
437 Africa). Furthermore, several countries that would qualify for discounts according to World  
438 Bank criteria are not on the list (Chan et al., 2012). Additionally, programmes such as  
439 Research4Life do not consider that even within high income countries, access to literature is not  
440 universal (Chan et al., 2012). Finally, the Research4Life [registration](#) requires the contact  
441 information of the organization's Librarian or Information Specialist. However, roughly half of  
442 our survey respondents, no matter where in the world they were located, report having no  
443 institutional access to scientific literature online, which suggests the lack of an institutional  
444 library to begin with, or at best a severely underfunded one.

445  
446 Although the conservation literature recognizes the research-implementation gap and even calls  
447 for investment in "knowledge brokers" (Cvitanovic et al., 2014; Sheikheldin et al., 2010), it  
448 rarely acknowledges the role of libraries in improving information flow, despite the fact that  
449 access to literature is traditionally brokered by an organization's library. Having institutional  
450 access to literature online increases the odds of easier access to literature by nearly seven times,  
451 which suggests that core support of libraries within institutions is key to improving access. The  
452 impact of the lack of institutional access is felt not just in the quality of work being produced, but  
453 also in loss of credibility and the amount of time required to obtain papers. One study found a  
454 correlation between e-journal consumption and research outcomes (Research Information  
455 Network, 2009), suggesting that the access provided by a well-funded library could have positive  
456 impacts beyond simply saving time. Calls for evidence-based approaches in conservation that  
457 prioritize the use of synthesized knowledge such as systematic reviews over traditional journal  
458 articles, akin to those employed in medicine and public health (Pullin & Knight, 2003; Cullen et  
459 al., 2001) stop short of acknowledging the crucial role of librarians in medical systematic  
460 reviews (Harris, 2005). Even the sharing of lessons learned from field projects is impeded by the  
461 lack of institutional support to library and information management; most conservation projects  
462 fail to document their work internally, and project libraries are not well-managed (Sayer &  
463 Campbell, 2004). This suggests that donors as well as conservation institutions themselves have  
464 a role to play in supporting library and information management functions if they are truly  
465 interested in ensuring experiences and results of conservation projects are widely shared and  
466 disseminated.

467

468 Other approaches to resolving the information divide have included harnessing the growing open  
469 access movement (Laakso et al., 2011). The Budapest Open Access Initiative, which produced  
470 one of the earliest and most widely used definitions of open access in 2002, recommended two  
471 complementary strategies for achieving free and unrestricted online availability of peer-reviewed  
472 journal literature: self-archiving by authors (i.e. green open access) and open access journals (i.e.  
473 gold open access) (Budapest Open Access Initiative, 2002).

474

475 In gold open access, a paper is made immediately available for free by the publisher on the  
476 journal's website, an approach that has been recommended in a number of influential reviews  
477 (e.g. Finch, 2013). Much of the challenge of access to the conservation literature might be  
478 resolved were funders of conservation research to require that all research outputs be published  
479 as open access (Harnad et al., 2008), a move that some major funders (e.g. US National Institutes  
480 of Health, European Union) have already adopted. Such a shift would have costs, though. Some  
481 are financial: the costs of publication is sometimes shifted from the readers to the authors, which  
482 can leave the problem of authors or their sponsoring organizations not having sufficient funds to  
483 pay the article processing charges levied by publishers for publishing in an open access journal  
484 (Siler et al., 2018; Peterson et al., 2019). One top-end estimate for how much a shift to open  
485 access would cost (for conservation science papers 2000–2013) is \$51m (Fuller et al., 2014),  
486 funds that arguably could be better spent on conservation practice itself. However, if gold open  
487 access publishing could be shifted away from hybrid open access to full open access journals,  
488 there would be significant cost savings, since the former have been shown to be more expensive  
489 than the latter (Pinfield et al., 2015). Meanwhile, publishers like PeerJ offer waivers to  
490 researchers from low-income countries or alternative pricing models such as author memberships  
491 (<https://peerj.com/about/FAQ/>). Other costs are more pernicious, such as the proliferation of  
492 “predatory publishers” (Beall, 2013).

493

494 An alternative to gold open access is green open access, whereby authors deposit post-  
495 acceptance but pre-formatting manuscripts into an online institutional or subject repository  
496 (Björk et al., 2014). Such systems have proven successful for disciplines such as physics, where  
497 arXiv respectively serves as a community-wide repository. In fact, conservation research can and  
498 has been deposited in arXiv and other preprint servers such as PeerJ Preprints, biorxiv, Zenodo,  
499 and preprints.org. The delayed and low levels of self-archiving by authors (Piwowar, 2018;  
500 Harnad, 2006) would still present a challenge, though.

501

502 Open access is consistent with our findings regarding information seeking behaviour: the  
503 conservation community as a whole, regardless of whether they have institutional access, turn to  
504 free material online very frequently. However, it is also not clear whether open access would  
505 save researchers time, given our finding that one of the impacts of lack of institutional access  
506 was the amount of time spent finding literature through alternate means.



507

508 In the short-term, our results might also provide guidance to strategic development of existing  
509 conservation libraries. Many such libraries are under severe budgetary constraints; our findings  
510 regarding conservationists' "most desired" journals may help to guide purchasing decisions for  
511 libraries without the resources to conduct a survey of their own user's preferred journals. In  
512 addition, our findings regarding preferred reading formats suggests that conservation libraries  
513 should continue to maintain hard copy books but could consider online-only access to scientific  
514 journals. Finally, our results should strengthen the arguments as to the importance of libraries in  
515 conservation agencies and institutions, given our strong evidence that those in the conservation  
516 community that have library-facilitated access to the literature benefit greatly in comparison to  
517 those that do not.

518

519

## 520 Conclusions

521 Access to scientific literature is a pernicious problem for more than half of the conservation  
522 community, with numerous negative effects as a result. Lack of institutional access is the  
523 primary predictor of disparities, followed by geographical location. In order to overcome the  
524 information divide and their subsequent limitations on conservation work, our survey results  
525 point towards solutions such as reinforcement of institutional and donor support to institutional  
526 libraries and knowledge management as well as of open access initiatives. Future work could  
527 include determining the levels of investments in libraries and information management as well as  
528 the gradations of institutional access provided by the employers (i.e. institutions) of conservation  
529 professionals, to go beyond the IUCN constituency as well as individuals' self-reported measures  
530 of access.

531

## 532 Acknowledgements

533 We are grateful to the 2,235 people through the IUCN constituency who completed the survey;  
534 D. Murith for help with survey design; A. Rodrigues and K. Holenstein for providing references;  
535 to G. Fragoso, M. Hoffmann, R. Mounce, J. Siikamaki, and M. Lambert for comments on the  
536 manuscript; and to K. Holzer, L. Patterson, and the two anonymous peer reviewers for their  
537 thoughtful and constructive peer reviews.

538

## 539 References

540

541 Ai, C., & Norton, E. C. (2003) Interaction terms in logit and probit models. *Economics letters*  
542 80(1): 123129. [https://doi.org/10.1016/S0165-1765\(03\)00032-6](https://doi.org/10.1016/S0165-1765(03)00032-6)



- 543 Akaike, H. (1974) A new look at the statistical model identification. *IEEE Transactions on*  
544 *Automatic Control* 19 (6): 716–723, MR 0423716, doi:10.1109/TAC.1974.1100705.
- 545 Amano, T., Gonzalez-Varo, J.P., Sutherland, W.J. (2016) Languages are still a major barrier to  
546 global science. *PLOS biology* 14(12): e200093.  
547 <https://doi.org/10.1371/journal.pbio.2000933>
- 548 American Library Association. Definition of a library: general definition. Available at  
549 <http://libguides.ala.org/library-definition> (accessed 06 March 2020)
- 550 Barber, P.H., Ablan-Lagman, M.C.A., Berlinck, R.G., Cahyani, D., Crandall, E.D., Ravago-  
551 Gotanco, R., Juinio-Meñez, M.A., Mahardika, I.G., Shanker, K., Starger, C.J. Toha,  
552 A.H.A. (2014) Advancing biodiversity research in developing countries: the need for  
553 changing paradigms. *Bulletin of Marine Science* 90: 187–210.  
554 <https://doi.org/10.5343/bms.2012.1108>
- 555 Bartol, T. (2013) Information literacy and international capacity development initiatives in life  
556 sciences: AGORA, OARE, HINARI, ARDI (Research4Life - R4L). In Kurbanoglu, S.,  
557 Grassian, E., Mizrachi, D., Catts, R., Špiranec, S., eds. *Worldwide Commonalities and*  
558 *Challenges in Information Literacy Research and Practice*. ECIL 2013. Communications  
559 in Computer and Information Science, vol 397. Springer, Cham, 338–344.  
560 [https://doi.org/10.1007/978-3-319-03919-0\\_44](https://doi.org/10.1007/978-3-319-03919-0_44)
- 561 Beall, J. (2013) Predatory publishing is just one of the consequences of gold open access.  
562 *Learned Publishing* 26: 79–84. <https://doi.org/10.1087/20130203>
- 563 Bendezú-Quispe, G., Nieto-Gutiérrez, W., Pacheco-Mendoza, J., Taype-Rondan, A. (2016) Sci-  
564 Hub and medical practice: an ethical dilemma in Peru. *The Lancet Global Health* 4(9):  
565 PE608. [https://doi.org/10.1016/S2214-109X\(16\)30188-7](https://doi.org/10.1016/S2214-109X(16)30188-7)
- 566 Björk, B.C., Laakso, M., Welling, P., Paetau, P. (2014) Anatomy of green open access. *Journal*  
567 *of the Association for Information Science and Technology* 65: 237–250.  
568 <https://doi.org/10.1002/asi.22963>
- 569 Bohannon, J. (2016) Who’s downloading pirated papers? Everyone. Available at  
570 <https://doi.org/10.1126/science.aaf5664>
- 571 Boudry, C., Alvarez-Muñoz, P., Arencibia-Jorge, R., Ayena, D., Brouwer, N.J., Chaudhuri, Z.,  
572 Chawner, B., Epee, E., Errais, K., Fotouhi, A., Gharaibeh, A.M., Hassanein, D.H., Herwig-  
573 Carl, M.C., Howard, K., Kaimbo Wa Kaimbo, D., Laughrea, P., Lopez, F.A., Machin-  
574 Mastromatteo, J.D., Malerbi, F.K., Amadou Ndiaye, P., Noor, N.A., Pacheco-Mendoza, J.,  
575 Papastefanou, V.P., Shah, M., Shields, C.L., Wang, Y.X., Yartsev, V., Mouriaux, F. (2019)  
576 Worldwide inequality in access to full text scientific articles: the example of  
577 ophthalmology. *PeerJ*:e7850. <https://doi.org/10.7717/peerj.7850>
- 578 Budapest Open Access Initiative (2002) Read the Budapest Open Access Initiative. Available at  
579 <https://www.budapestopenaccessinitiative.org/read> (accessed 6 March 2020)
- 580 Burton, A. (2011) Sharing science: enabling global access to the scientific literature.  
581 *Environmental Health Perspectives* 119(12). <https://doi.org/10.1289/ehp.119-a520>

- 582 Büttikofer, J. (1946) *Rapport sur la Conférence pour la Protection Internationale de la Nature* =  
583 *Report on the Conference for the International Protection of Nature*. Basel: The Swiss  
584 League for the Protection of Nature
- 585 Büttikofer, J. (1947) *Conférence internationale pour la protection de la nature, Brunnen, 28 juin*  
586 *- 3 juillet 1947: procès-verbaux, résolutions et rapports = International Conference for the*  
587 *Protection of Nature, Brunnen, June 28th–July 3rd 1947 : proceedings, resolutions and*  
588 *reports*. Basel: Provisional International Union for the Protection of Nature
- 589 Ceci, S.J., Williams, W.M. (2011) Understanding current causes of women's underrepresentation  
590 in science. *Proceedings of the National Academy of Sciences of the U.S.A.* 108(8): 3157–  
591 3162. <https://doi.org/10.1073/pnas.1014871108>
- 592 Chan, L., Kirsop, B., Arunachalam, S. (2011) Towards open and equitable access to research and  
593 knowledge for development. *PLoS Medicine* 8(3): e1001016.  
594 <https://doi.org/10.1371/journal.pmed.1001016>
- 595 Chan, L., Gray, E., Kahn, R. (2012) *Open Access and Development: journals and beyond*.  
596 Brighton: Institute of Development Studies (IDS)
- 597 Coloma, J., Harris, E. (2005) Open-Access Science: A Necessity for Global Public Health. *PLoS*  
598 *Pathog* 1(2): e21. <https://doi.org/10.1371/journal.ppat.0010021>
- 599 Connaway, L.S., Dickey, T.J., Radford, M.L. (2011) “If it is too inconvenient I'm not going after  
600 it:” Convenience as a critical factor in information-seeking behaviors. *Library &*  
601 *Information Science Research* 33: 179–190. <https://doi.org/10.1016/j.lisr.2010.12.002>
- 602 Cvitanovic, C., Fulton C.J., Wilson, S.K., van Kerkhoff, L., Cripps, I.L., Muthiga, N. (2014).  
603 Utility of primary scientific literature to environmental managers: An international case  
604 study on coral-dominated marine protected areas. *Ocean and coastal management* 102:  
605 72–78. <https://doi.org/10.1016/j.ocecoaman.2014.09.003>
- 606 Cook, C.N., Hockings, M., Carter, R.W. (2010) Conservation in the dark? The information used  
607 to support management decisions. *Frontiers in Ecology and the Environment* 8(4): 181–  
608 186. <https://doi.org/10.1890/090020>
- 609 Cullen, P., Cottingham, P., Doolan, J., Edgar, B., Ellis, C., Fisher, M., Flett, D., Johnson, D.,  
610 Sealie, L., Stocklmayer, S., Vanclay, F., Whittington, J. (2001) *Knowledge seeking*  
611 *strategies of natural resource professional : synthesis of a workshop held in Bungendore,*  
612 *NSW from 5–7<sup>th</sup> June 2000. Technical report 2/2001*. Cooperative Research Centre for  
613 Freshwater Ecology.
- 614 Fabian, Y., Bollmann, K., Brang, P., Heiri, C., Olschewski, R., Rigling, A., Stofer, S.,  
615 Holderegger, R. (2019) How to close the science-practice gap in nature conservation?  
616 Information used by practitioners. *Biological Conservation* 235: 93–101.  
617 <https://doi.org/10.1016/j.biocon.2019.04.011>
- 618 Finch, D.J. (2013) Accessibility, sustainability, excellence: the UK approach to Open Access.  
619 *Information Services & Use* 33(1): 11–18. <https://doi.org/10.3233/ISU-130687>
- 620 Fisher, M. (2015) A literature for all conservationists, everywhere? *Oryx* 49(1): 1–2.  
621 <https://doi.org/10.1017/S0030605314001094>

- 622 Fonseca, G., Benson, P.J. (2003) Biodiversity conservation demands open access. *PLoS Biology*  
623 1(2): e46. <https://doi.org/10.1371/journal.pbio.0000046>
- 624 Fuller, R.A., Lee, J.R., Watson, J.E.M. (2014) Achieving open access to conservation science.  
625 *Conservation Biology* 28(6): 1550–1557. <https://doi.org/10.1111/cobi.12346>
- 626 Gaulé, P. (2009) Access to scientific literature in India. *Journal of the American Society for*  
627 *Information Science and Technology* 60(12): 2548–2553. <https://doi.org/10.1002/asi.21195>
- 628 Godlee, F., Pakenham-Walsh, N., Ncayiyana, D., Cohen, B., Packer, A. (2004) Can we achieve  
629 health information for all by 2015? *The Lancet* 364(9430): 295–300.  
630 [https://doi.org/10.1016/S0140-6736\(04\)16681-6](https://doi.org/10.1016/S0140-6736(04)16681-6)
- 631 Gossa, C., Fisher, M., Milner-Gulland, E.J. (2015) The research–implementation gap: how  
632 practitioners and researchers from developing countries perceive the role of peer-reviewed  
633 literature in conservation science. *Oryx* 49(1): 80–87.  
634 <https://doi.org/10.1017/S0030605313001634>
- 635 Greshake, B. (2016) Correlating the Sci-Hub data with World Bank indicators and identifying  
636 academic use. Available at [https://thewinnower.com/papers/4715-correlating-the-sci-hub-](https://thewinnower.com/papers/4715-correlating-the-sci-hub-data-with-world-bank-indicators-and-identifying-academic-use)  
637 [data-with-world-bank-indicators-and-identifying-academic-use](https://thewinnower.com/papers/4715-correlating-the-sci-hub-data-with-world-bank-indicators-and-identifying-academic-use).
- 638 Harnad, S. Maximising research impact through institutional and national open-access self-  
639 archiving mandates. Jeffrey, Keith (ed.) *CRIS2006. Current Research Information*  
640 *Systems: Open Access Institutional Repositories, Bergen, Norway. 11 - 13 May 2006*.
- 641 Harnad, S., Brody, T., Vallieres, F., Carr, L., Hitchcock, S., Gingras, Y., Oppenheim, C., Hajjem,  
642 C., Hilf, E.R. (2008) The access/impact problem and the green and gold roads to open  
643 access: an update. *Serials Review* 34(1): 36–40.  
644 <https://doi.org/10.1016/j.serrev.2007.12.005>
- 645 Harris, M.R. (2005) The librarian’s roles in the systematic review process: a case study. *J Med*  
646 *Libr Assoc.* 93(1): 81–87.
- 647 Himmelstein, D.S., Rodriguez Romero, A., Levernier, J.G., Munro, T.A., Reid McLaughlin, S.,  
648 Greshake Tzovaras, B., Greene, C.S. (2017) Research: Sci-Hub provides access to nearly  
649 all scholarly literature. *eLife*. <https://doi.org/10.7554/eLife.32822>
- 650 Horton, R. (2000) North and South: bridging the information gap. *The Lancet* 355(9222): 2231–  
651 2236. [https://doi.org/10.1016/S0140-6736\(00\)02414-4](https://doi.org/10.1016/S0140-6736(00)02414-4)
- 652 IUCN (1951) *Proceedings and reports of the second session of the General Assembly held in*  
653 *Brussels, 18-23 October 1950 in the Institut de Sociologie Solvay de l’Université Libre de*  
654 *Bruxelles*. Brussels: IUCN
- 655 Jones, T.H., Hanney, S., Buxton, M.J. (2006) The journals of importance to UK clinicians: a  
656 questionnaire survey of surgeons. *BMC Medical Informatics and Decision Making* 6:24.  
657 <https://doi.org/10.1186/1472-6947-6-24>
- 658 Karlsson, S., Srebotnjak, T., Gonzales, P. (2007) Understanding the North–South knowledge  
659 divide and its implications for policy: a quantitative analysis of the generation of scientific  
660 knowledge in the environmental sciences. *Environmental Science & Policy* 10: 668–684.  
661 <https://doi.org/10.1016/j.envsci.2007.04.001>

- 662 Kaur, A. (2012). Academics' attitudes towards use of electronic journals: A case study of Punjab  
663 and Chandigarh. *The International Information & Library Review* 44(4): 182-193.  
664 <https://doi.org/10.1016/j.iilr.2012.09.003>
- 665 Laakso, M., Welling, P., Bukvova, H., Nyman, L., Björk, B.C., Hedlund, T. (2011) The  
666 development of open access journal publishing from 1993 to 2009. *PloS ONE* 6(6):  
667 p.e20961. <https://doi.org/10.1371/journal.pone.0020961>
- 668 Leckie, G.J., Pettigrew, K.E., and Sylvain, C. (1996). Modeling the information seeking of  
669 professionals: A general model derived from research on engineers, health care  
670 professionals, and lawyers. *Library Quarterly* 66 (2): 161–193.  
671 <https://doi.org/10.1086/602864>
- 672 Nuñez, Martin A., Barlow, J., Cadotte, M., Lucas, K., Newton, E., Pettorelli, N., Stephens, P.A.  
673 (2019) Assessing the uneven global distribution of readership, submissions and  
674 publications in applied ecology: obvious problems without obvious solutions. *Journal of*  
675 *Applied Ecology* 56:4–9. <https://doi.org/10.1111/1365-2664.13319>
- 676 Pasgaard, M., Strange, N. (2013) A quantitative analysis of the causes of the global climate  
677 change research distribution. *Global Environmental Change* 23(6): 1684–1693.  
678 <https://doi.org/10.1016/j.gloenvcha.2013.08.013>
- 679 Peterson, A.T., Anderson, R.P., Beger, M., Bolliger, J., Brotons, L., Burrridge, C.P., Cobos, M.E.,  
680 Cuervo-Robayo, A.P., Di Minin, E., Diez, J., Elith, J., Embling, C.B., Escobar, L.E., Essl,  
681 F., Feeley, K.J., Hawkes, L., Jiménez-García, D., Jimenez, L. Green, D.M., Knop, E.,  
682 Kühn, I., Lahoz-Monfort, J.J., Lira-Noriega, A., Lobo, J.M., Loyola, R., Mac Nally, R.,  
683 Machado-Stredel, F., Martínez-Meyer, E., McCarthy, M., Merow, C., Nori, J., Nuñez-  
684 Penichet, C., Osorio-Olvera, L., Pyšek, P., Rejmánek, M., Ricciardi, A., Robertson, M.,  
685 Rojas Soto, O. Romero-Alvarez, D., Roura-Pascual, N., Santini, L., Schoeman, D.S.,  
686 Schröder, B., Soberon, J., Strubbe, D., Thuiller, W., Traveset, A., Treml, E.A., Václavik,  
687 T., Varela, S., Watson, J.E.M., Wiersma, Y., Wintle, B., Yanez-Arena, C., Zurell, D.  
688 (2019). Open access solutions for biodiversity journals: Do not replace one problem with  
689 another. *Diversity and distributions* 25(1):5–8. <https://doi.org/10.1111/ddi.12885>
- 690 Pinfield, S., Salter, J., Bath, P.A. (2015) The “total cost of publication” in a hybrid open-access  
691 environment: Institutional approaches to funding journal article-processing charges in  
692 combination with subscriptions. *Journal of the Association for Information Science and*  
693 *Technology* 67(7): 1751–1766. <https://doi.org/10.1002/asi.23446>
- 694 Piwowar, H., Priem, J., Larivière, V., Alperin, J.P., Matthias, L., Norlander, B., Farley, A., West,  
695 J., Haustein, S. (2018) The state of OA: a large-scale analysis of the prevalence and impact  
696 of Open Access articles. *PeerJ* 6:e4375. <https://doi.org/10.7717/peerj.4375>
- 697 Pullin, A.S., Knight, T.M. (2003) Support for decision making in conservation practice: an  
698 evidence-based approach. *Journal for Nature Conservation* 11(2): 83–90.  
699 <https://doi.org/10.1078/1617-1381-00040>
- 700 R Core Team (2017). R: A language and environment for statistical computing. R Foundation for  
701 Statistical Computing, Vienna, Austria. Available at <https://www.R-project.org/>.

- 702 Rafidimanantsoa, H.P., Poudyal, M., Ramamonjisoa, B.S., Gordon Jones, J.P. (2018) Mind the  
703 gap: the use of research in protected area management in Madagascar. *Madagascar*  
704 *Conservation & Development* 13(1): 15–24. <https://doi.org/10.4314/mcd.v13i1.3>  
705 Research Information Network (2009) *E-journals: their use, value and impact*. London:  
706 Research Information Network.
- 707 Rodrigues, A.S., Gray, C.L., Crowter, B.J., Ewers, R.M., Stuart, S.N., Whitten, T., Manica, A.,  
708 (2010) A global assessment of amphibian taxonomic effort and expertise. *BioScience*  
709 60(10): 798–806. <https://doi.org/10.1525/bio.2010.60.10.6>
- 710 Roy, S., Smith, G., Russell, J.C. (2009). The eradication of invasive mammal species: can  
711 adaptive resource management fill the gaps in our knowledge? *Human-Wildlife Conflicts*  
712 3(1): 30–40.
- 713 Sayer, J., Campbell, B. (2004). *The science of sustainable development: Local livelihoods and*  
714 *the global environment*. Cambridge: Cambridge University Press.
- 715 Seavy, N.E., Howell, C.A. (2010). How can we improve information delivery to support  
716 conservation and restoration decisions? *Biodiversity Conservation* 19(5):1261–1267.
- 717 Sheikheldin, G., Krantzberg, G., Schaefer, K. (2010) Science-seeking behaviour of conservation  
718 authorities in Ontario. *Environmental Management* 45:912–921.
- 719 Siler, K., Haustein, S., Smith, E., Larivière, V., Alperin, J.P. (2018) Authorial and institutional  
720 stratification in open access publishing: the case of global health research. *PeerJ* 6:e4269.  
721 <https://doi.org/10.7717/peerj.4269>
- 722 Smith, H., Bukirwa, H., Mukasa, O., Snell, P., Adeh-Nsoh, S., Mbuyita, S., Honorati, M., Orji,  
723 B., Garner, P. (2007) Access to electronic health knowledge in five countries in Africa: a  
724 descriptive study. *BMC Health Services Research* 7:72. [https://doi.org/10.1186/1472-6963-](https://doi.org/10.1186/1472-6963-7-72)  
725 [7-72](https://doi.org/10.1186/1472-6963-7-72)
- 726 Steiner Davis, M.L.E., Tenopir, C., Allard, S., Frame, M.T. (2014) Facilitating access to  
727 biodiversity information; A survey of users’ needs and practices. *Environmental*  
728 *Management* 53(3): 690–701.
- 729 Tenopir, C., Christian, L., Kaufam, J. (2019) Seeking, reading, and use of scholarly articles: an  
730 international study of perceptions and behavior of researchers. *Publications* 7(1), 18.  
731 <https://doi.org/10.3390/publications7010018>
- 732 Villafuerte-Gálvez, J., Curioso, W.H., Gayoso, O. (2007) Biomedical journals and global  
733 poverty: Is HINARI a step backwards? *PLOS Medicine* 4(6): 220.  
734 <https://doi.org/10.1371/journal.pmed.0040220>
- 735 Walsh, J.C., Dicks, L.V., Sutherland, W.J. (2015) The effect of scientific evidence on  
736 conservation practitioners’ management decisions. *Conservation Biology* 29(1): 88–98.  
737 <https://doi.org/10.1111/cobi.12370>
- 738 Wilson, K.A., Auerbach, N.A., Sam, K., Magini, A.G., Moss, A.S.L., Langhans, S.D., Budiharta,  
739 S., Terzano, D., Meijaard, E. (2016) Conservation research is not happening where it is  
740 most needed. *PLoS Biology* 14(3): e1002413. <https://doi.org/10.1371/journal.pbio.1002413>



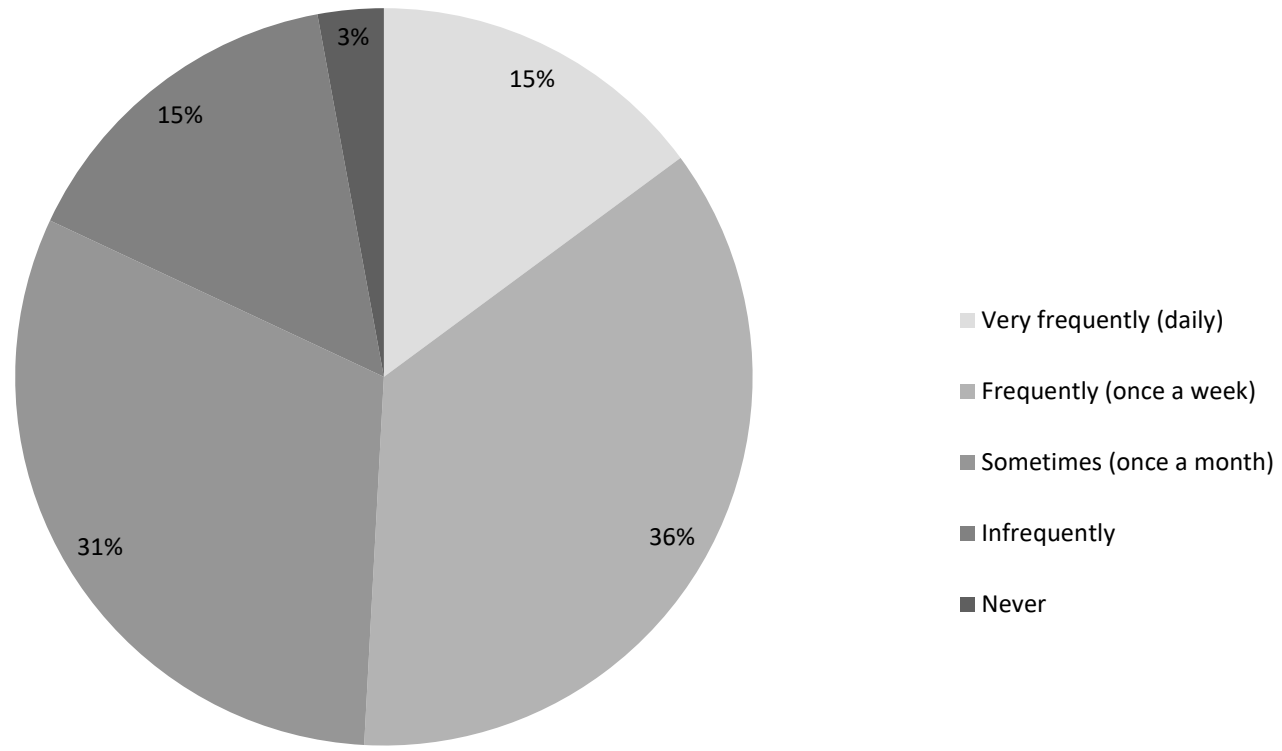

Figure 1 Required frequency of access to scientific literature (n=2285).



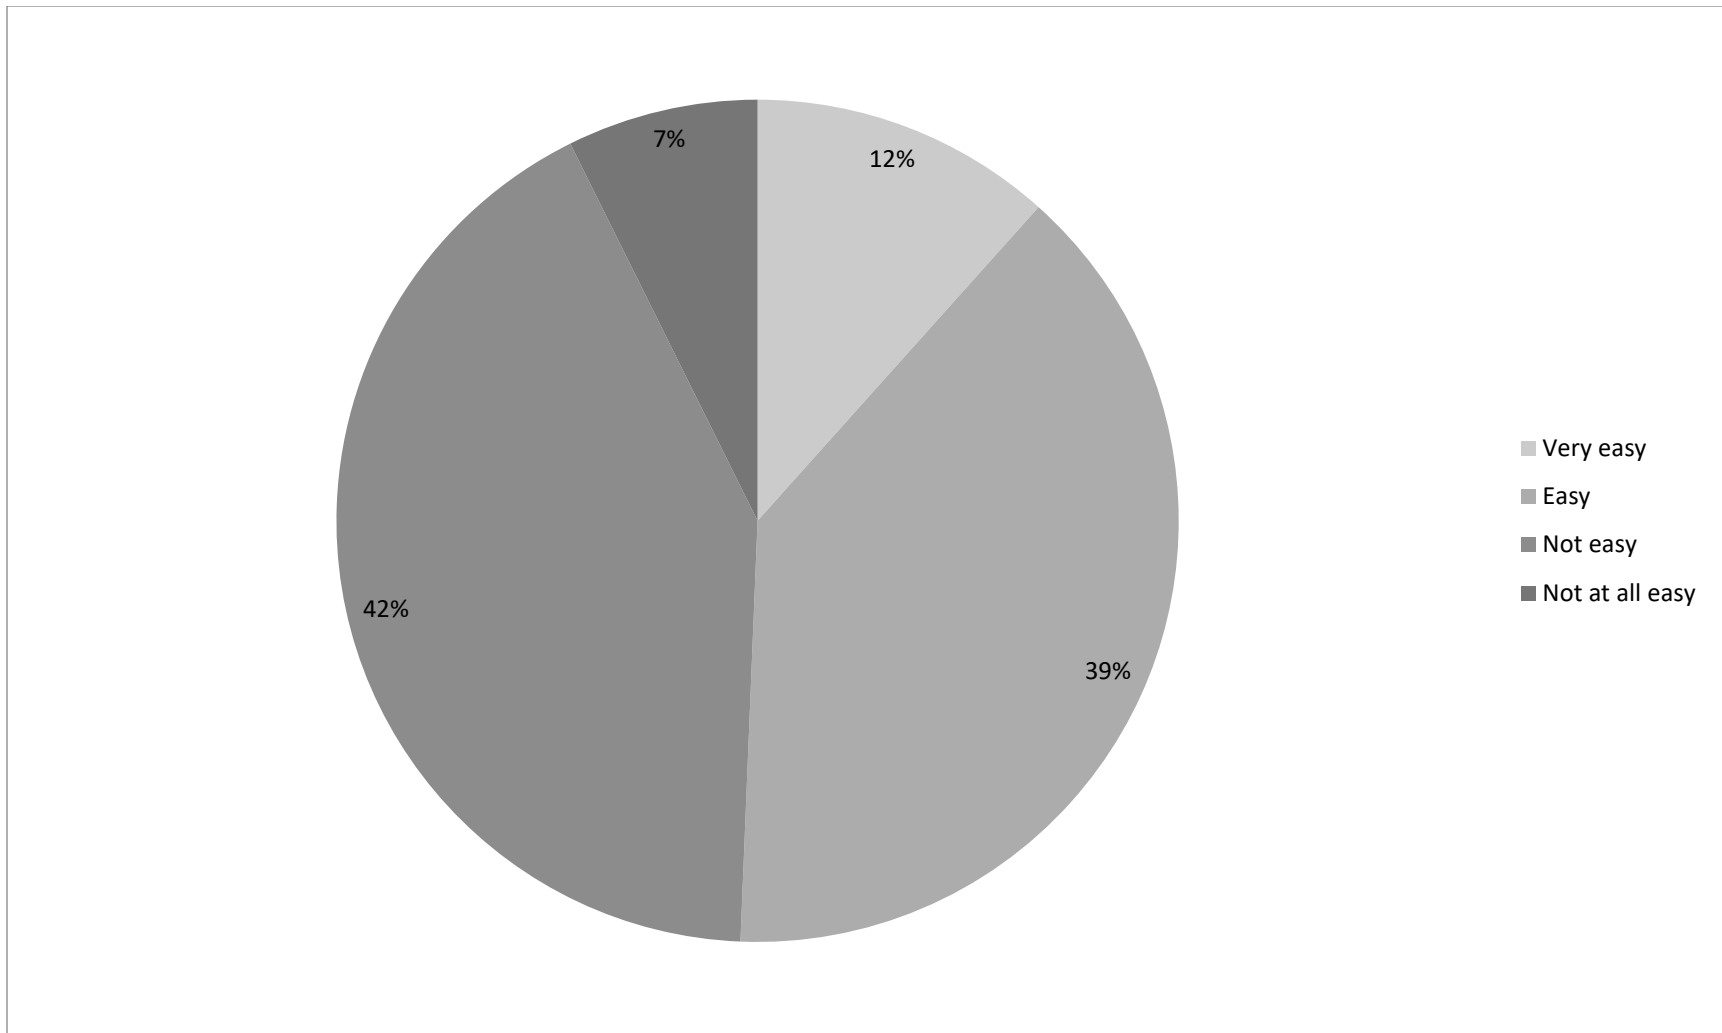

Figure 2 Ease of access to scientific literature in the conservation community (n = 2,004).

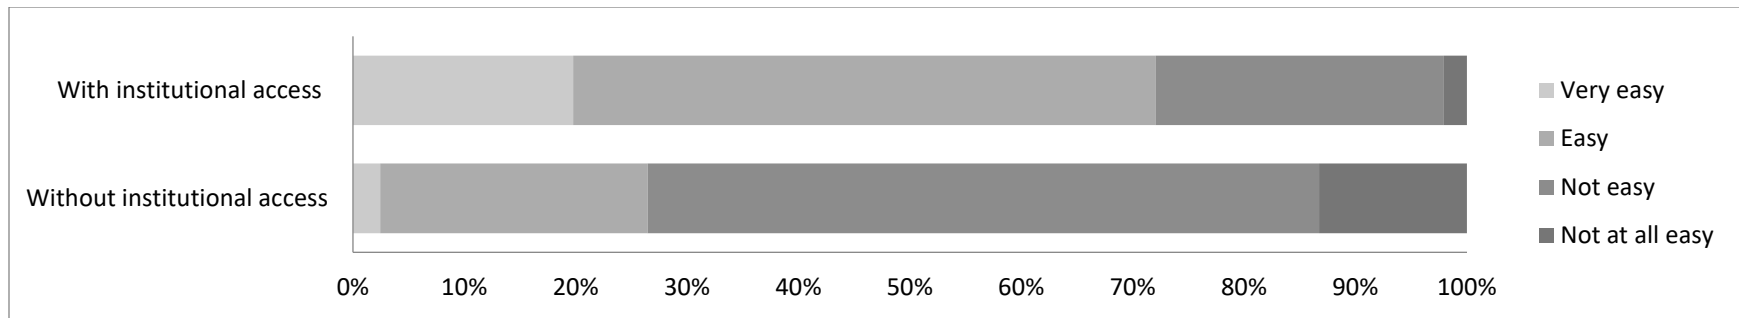

Figure 3 Ease of access to scientific literature among those in the conservation community according to whether they reported having institutional access to scientific literature (n = 2,004).

| <b>Ease of Access</b>                      | <b>Coef.</b>   | <b>Odds ra.</b> | <b>Std. Err.</b> | <b>z</b>      | <b>p</b>            |
|--------------------------------------------|----------------|-----------------|------------------|---------------|---------------------|
| <b>Model Intercept</b>                     | <b>-1.5754</b> | <b>.2069</b>    | <b>0.1711</b>    | <b>-9.207</b> | <b>&lt;2e-16***</b> |
| <b>Region: Asia-Pacific</b>                | 0.2610         | 1.2982          | 0.1819           | 1.435         | 0.151               |
| <b>Region: Eastern Europe</b>              | 0.2266         | 1.2544          | 0.2729           | 0.831         | 0.406               |
| <b>Region: Latin America and Caribbean</b> | 0.1824         | 1.2001          | 0.1940           | 0.940         | 0.345               |
| <b>Region: Western Europe and Others</b>   | <b>0.5467</b>  | <b>1.7275</b>   | <b>0.1587</b>    | <b>3.445</b>  | <b>0.000572***</b>  |
| <b>Gender: Male</b>                        | <b>0.3208</b>  | <b>1.3782</b>   | <b>0.1117</b>    | <b>2.873</b>  | <b>0.00407***</b>   |
| <b>Institutional Access: Yes</b>           | <b>1.9251</b>  | <b>6.8558</b>   | <b>0.1028</b>    | <b>18.723</b> | <b>&lt;2e-16***</b> |

*Table 1 Summary of the final binomial logistic regression model.*

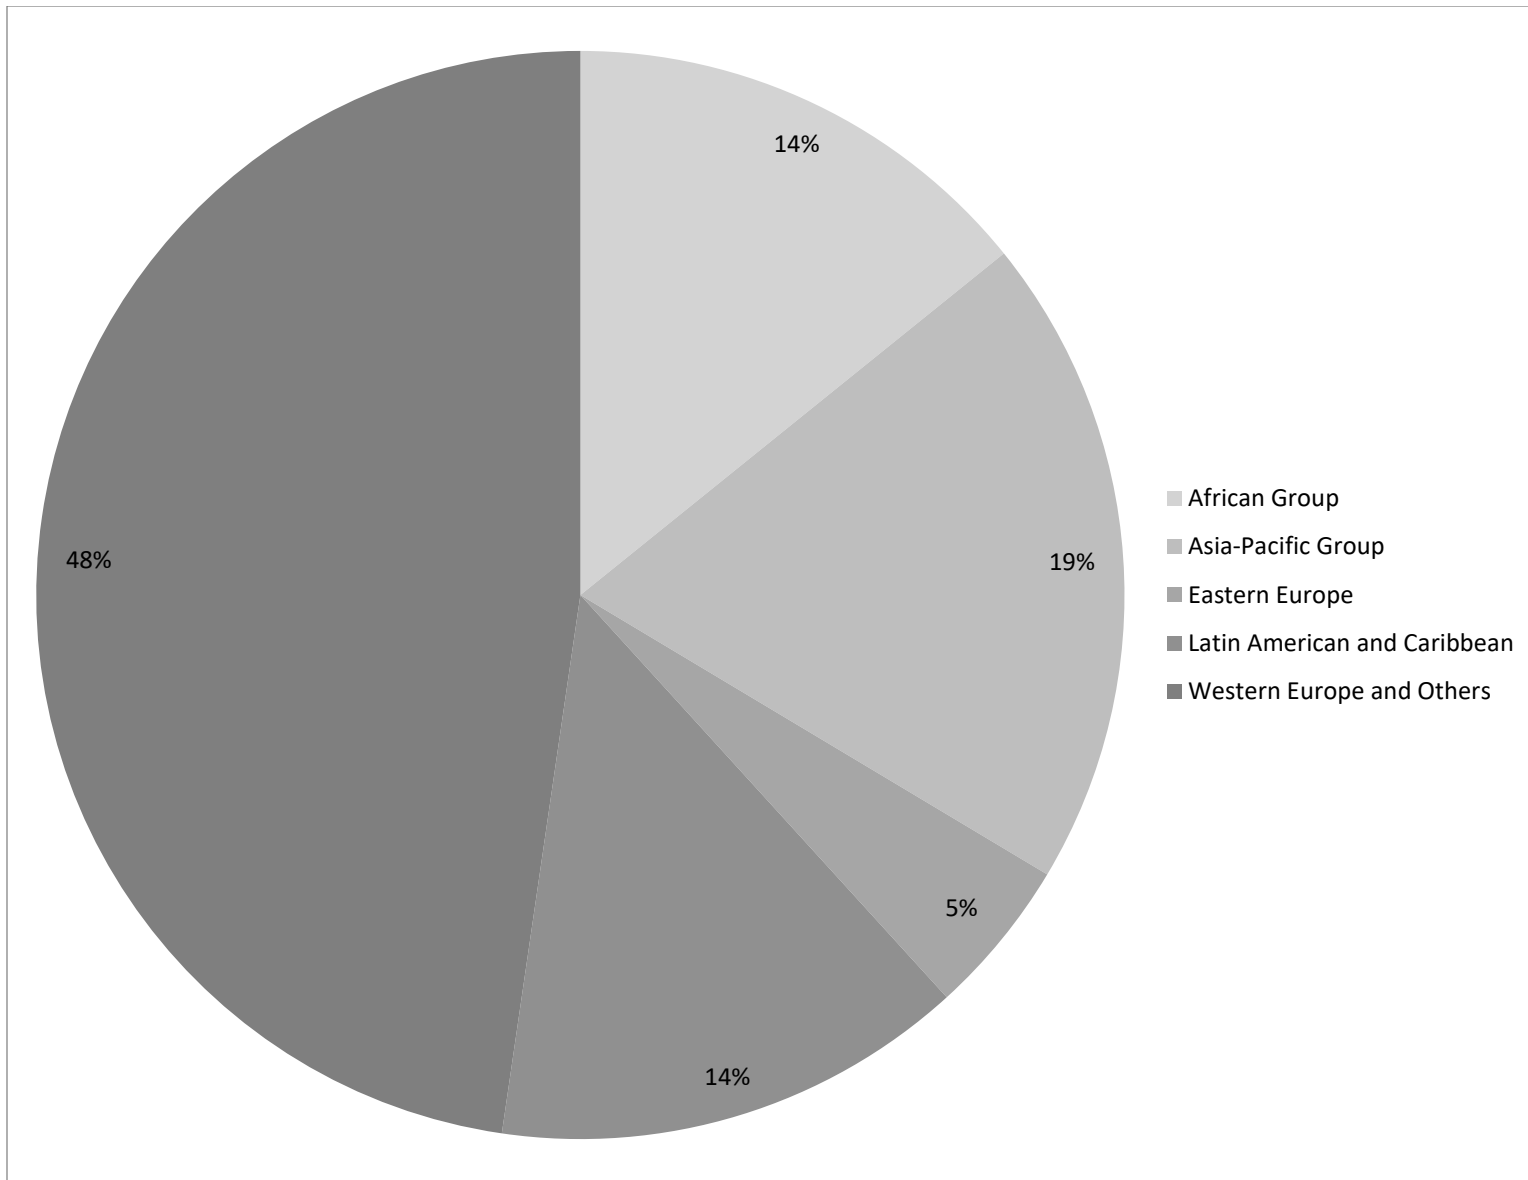

Figure 4 Survey respondents grouped by region (n=2254).

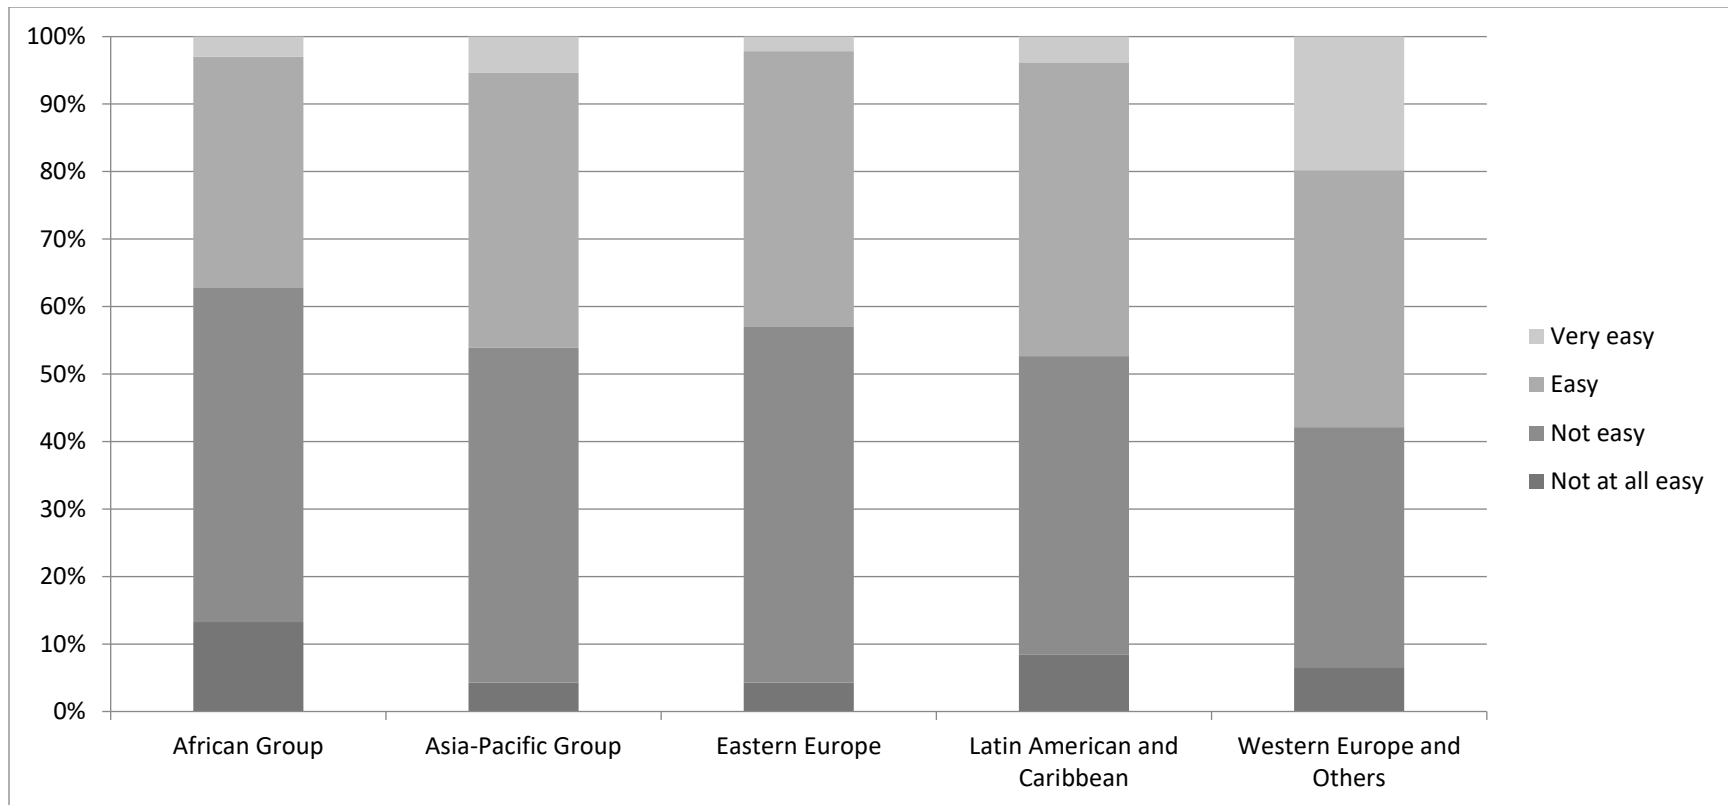

Figure 5 Levels of ease of access to scientific literature for IUCN-related work among respondents from the five UN regions (n = 1,982).

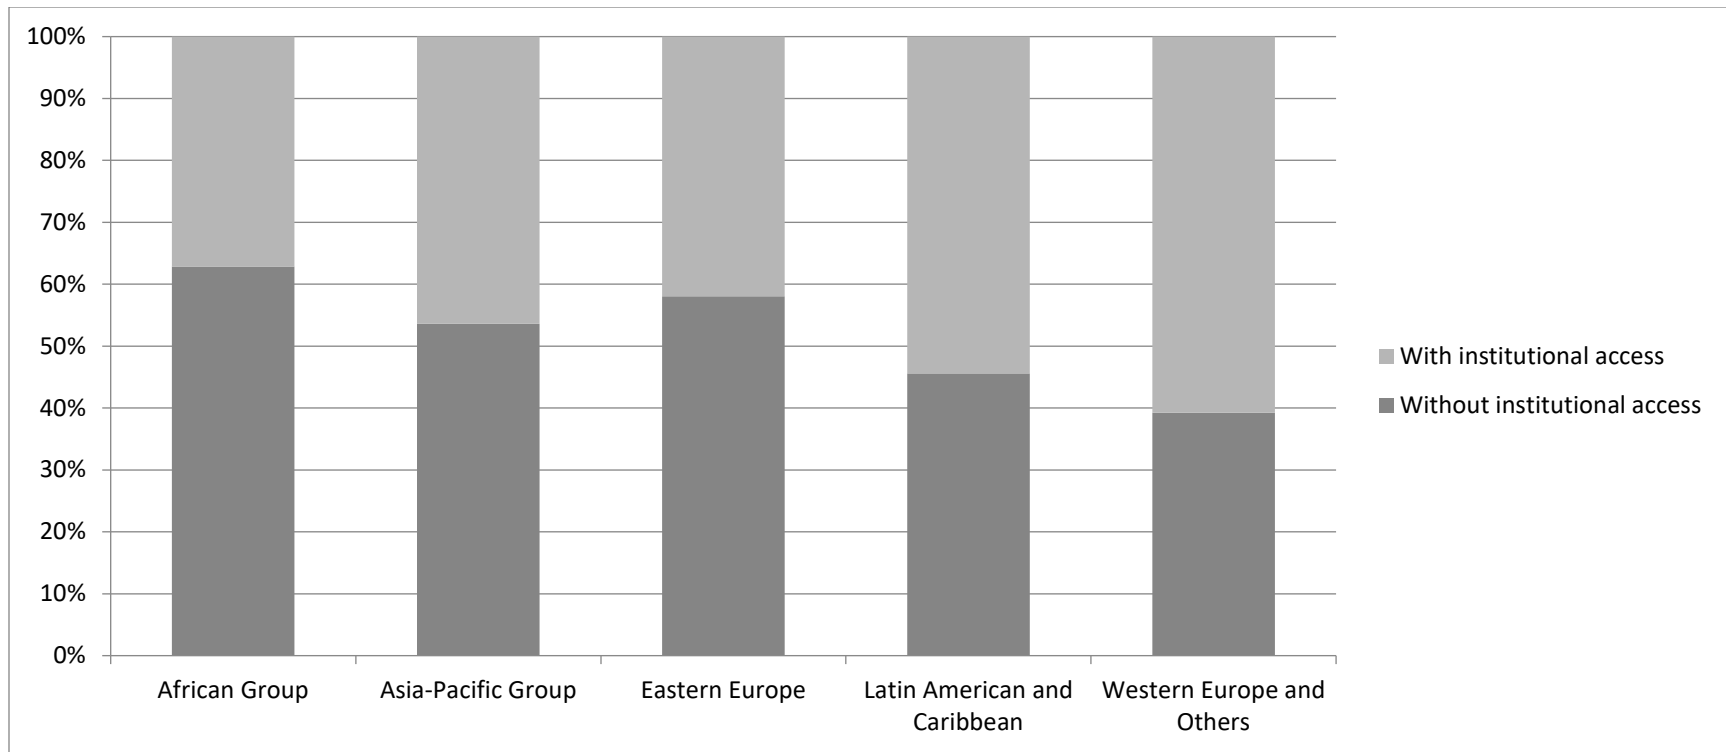

Figure 6 Levels of reported online institutional access to scientific literature among respondents from the five UN regions (n=1982).



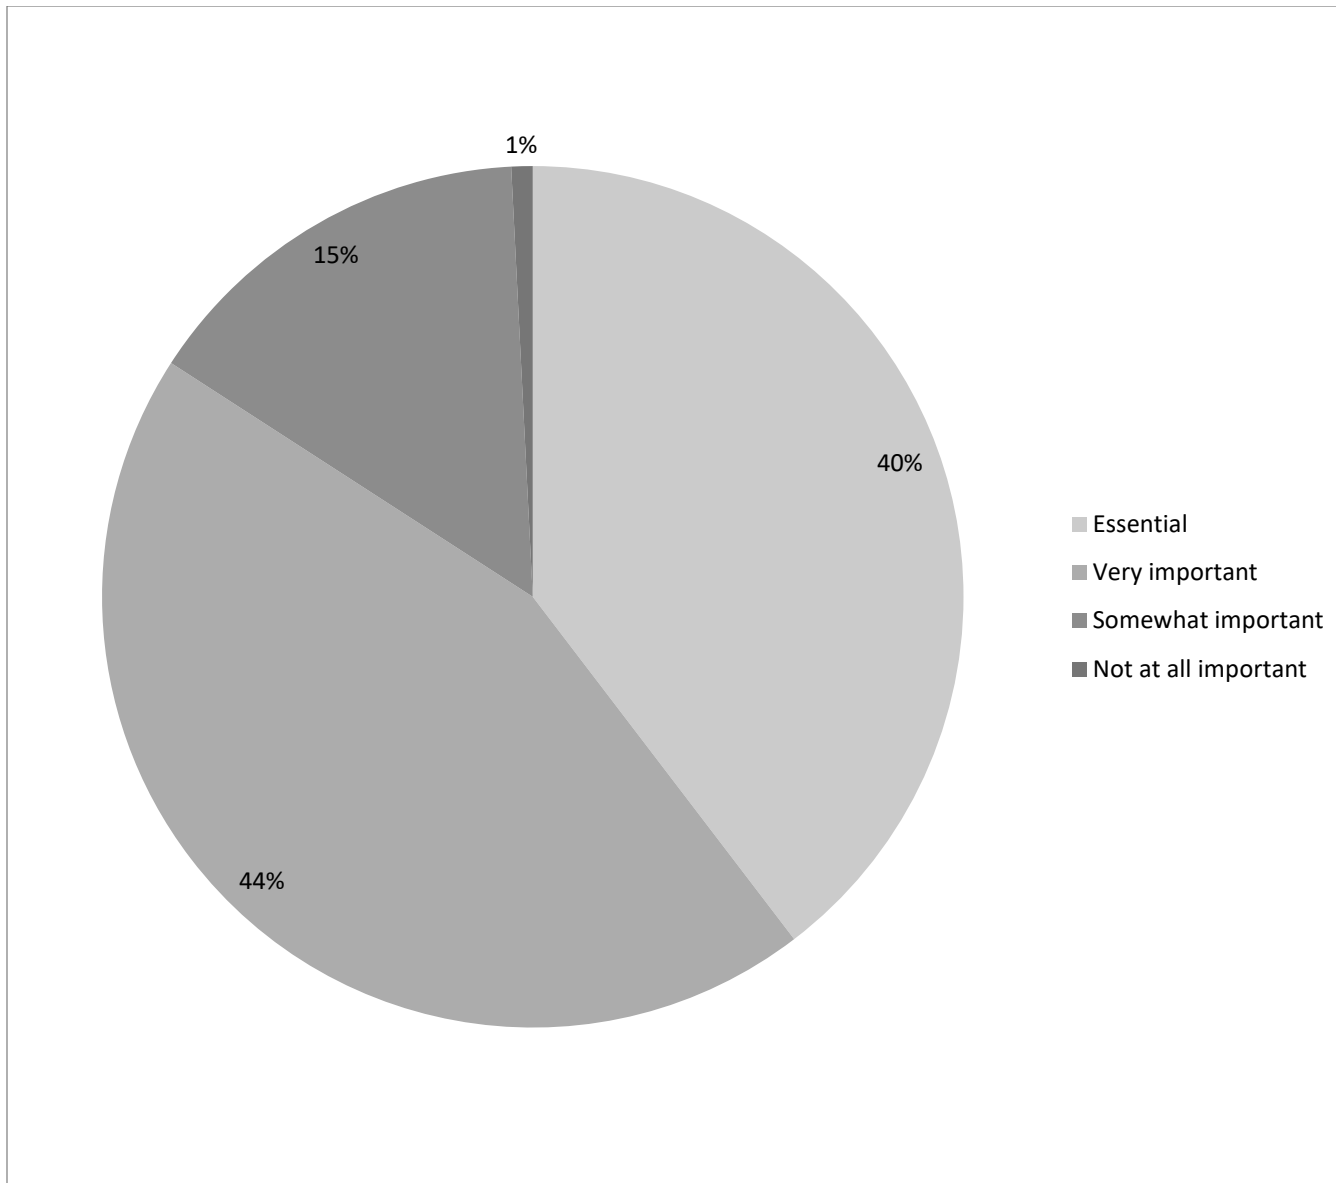

Figure 7 Importance of easy access to scientific literature (n = 2,004).

| <b>IUCN Commission</b>                                           | <b>Disciplinary specialisation</b>        | <b>Survey respondents (number)</b> | <b>Responses to Q9 (number)</b> | <b>Institutional access (percentage)</b> |
|------------------------------------------------------------------|-------------------------------------------|------------------------------------|---------------------------------|------------------------------------------|
| Commission on Education and Communication (CEC)                  | Environmental education and communication | 155                                | 125                             | 50                                       |
| Commission on Environmental, Economic, and Social Policy (CEESP) | Environmental social science              | 127                                | 112                             | 53                                       |
| Commission on Ecosystems Management (CEM)                        | Ecosystem conservation                    | 165                                | 156                             | 54                                       |
| World Commission on Environmental Law (WCEL)                     | Environmental law                         | 77                                 | 58                              | 60                                       |
| World Commission on Protected Areas(WCPA)                        | Protected areas                           | 407                                | 370                             | 42                                       |
| Species Survival Commission (SSC)                                | Species conservation                      | 1,050                              | 950                             | 58                                       |

*Table 2 Disciplinary variation in proportion of respondents with institutional literature access.*

| <b>Sector</b>                             | <b>Survey respondents<br/>(number)</b> | <b>Responses to Q9<br/>(number)</b> | <b>Institutional access (percentage)</b> |
|-------------------------------------------|----------------------------------------|-------------------------------------|------------------------------------------|
| IUCN Secretariat                          | 155                                    | 132                                 | 28                                       |
| State and/or Government Agency<br>Members | 134                                    | 113                                 | 58                                       |
| International NGO Members                 | 124                                    | 108                                 | 45                                       |
| National NGO Members                      | 237                                    | 207                                 | 48                                       |

*Table 3 Variation by sector in proportion of respondents with institutional literature access.*

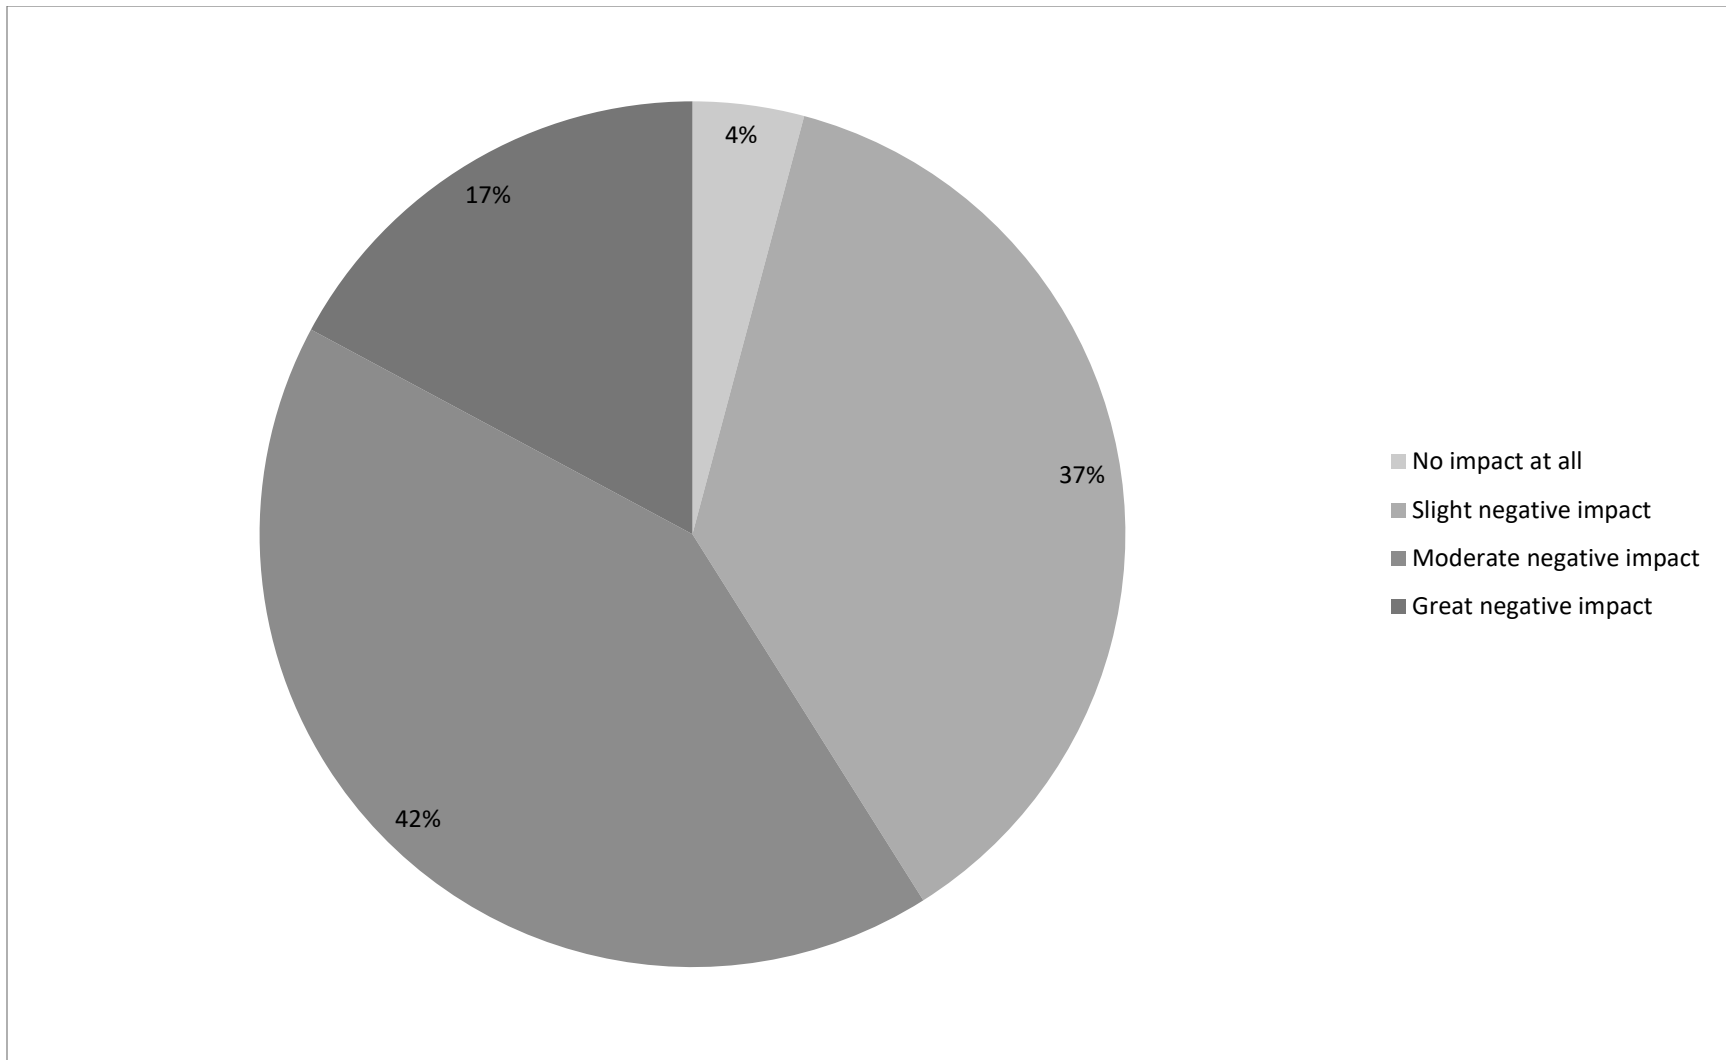

Figure 8 Impact on IUCN-related work of not having institutional access to scientific literature online (n = 938).

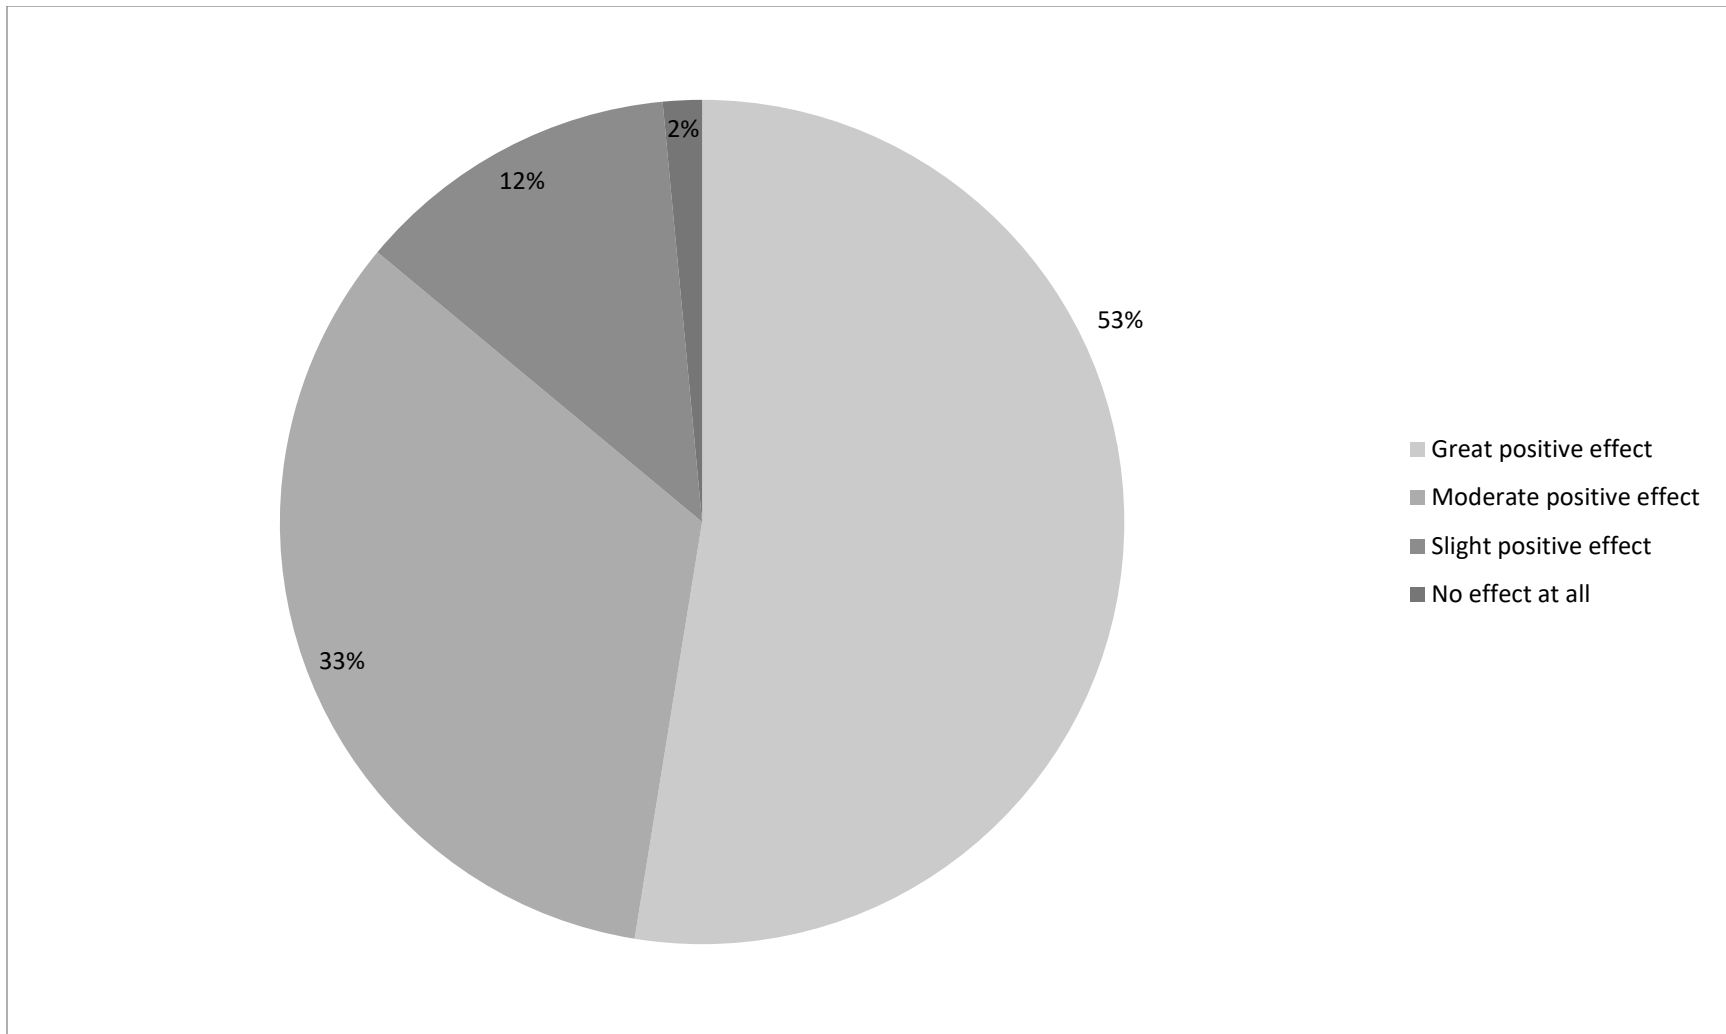

Figure 9 Effect on quality of IUCN-related work if institutional access to scientific literature online were obtained (n = 938).

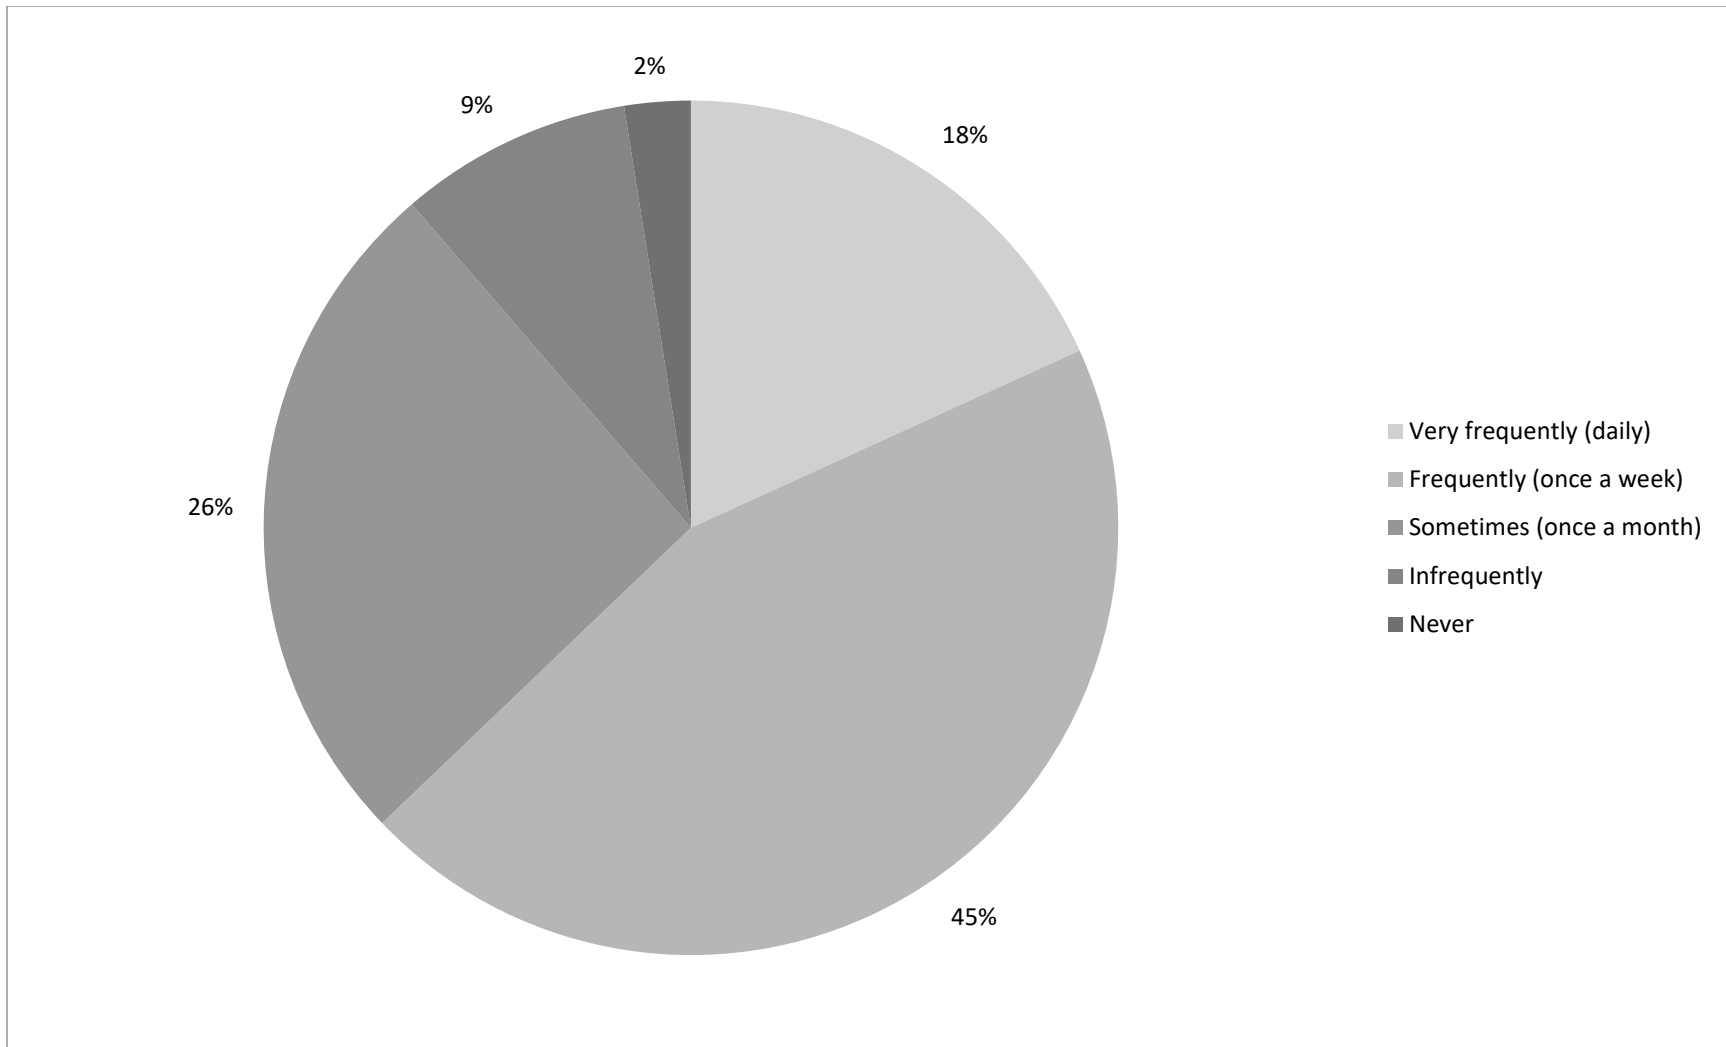

Figure 10 How frequently those reporting no institutional access would use it for IUCN-related work if they had it (n = 918).

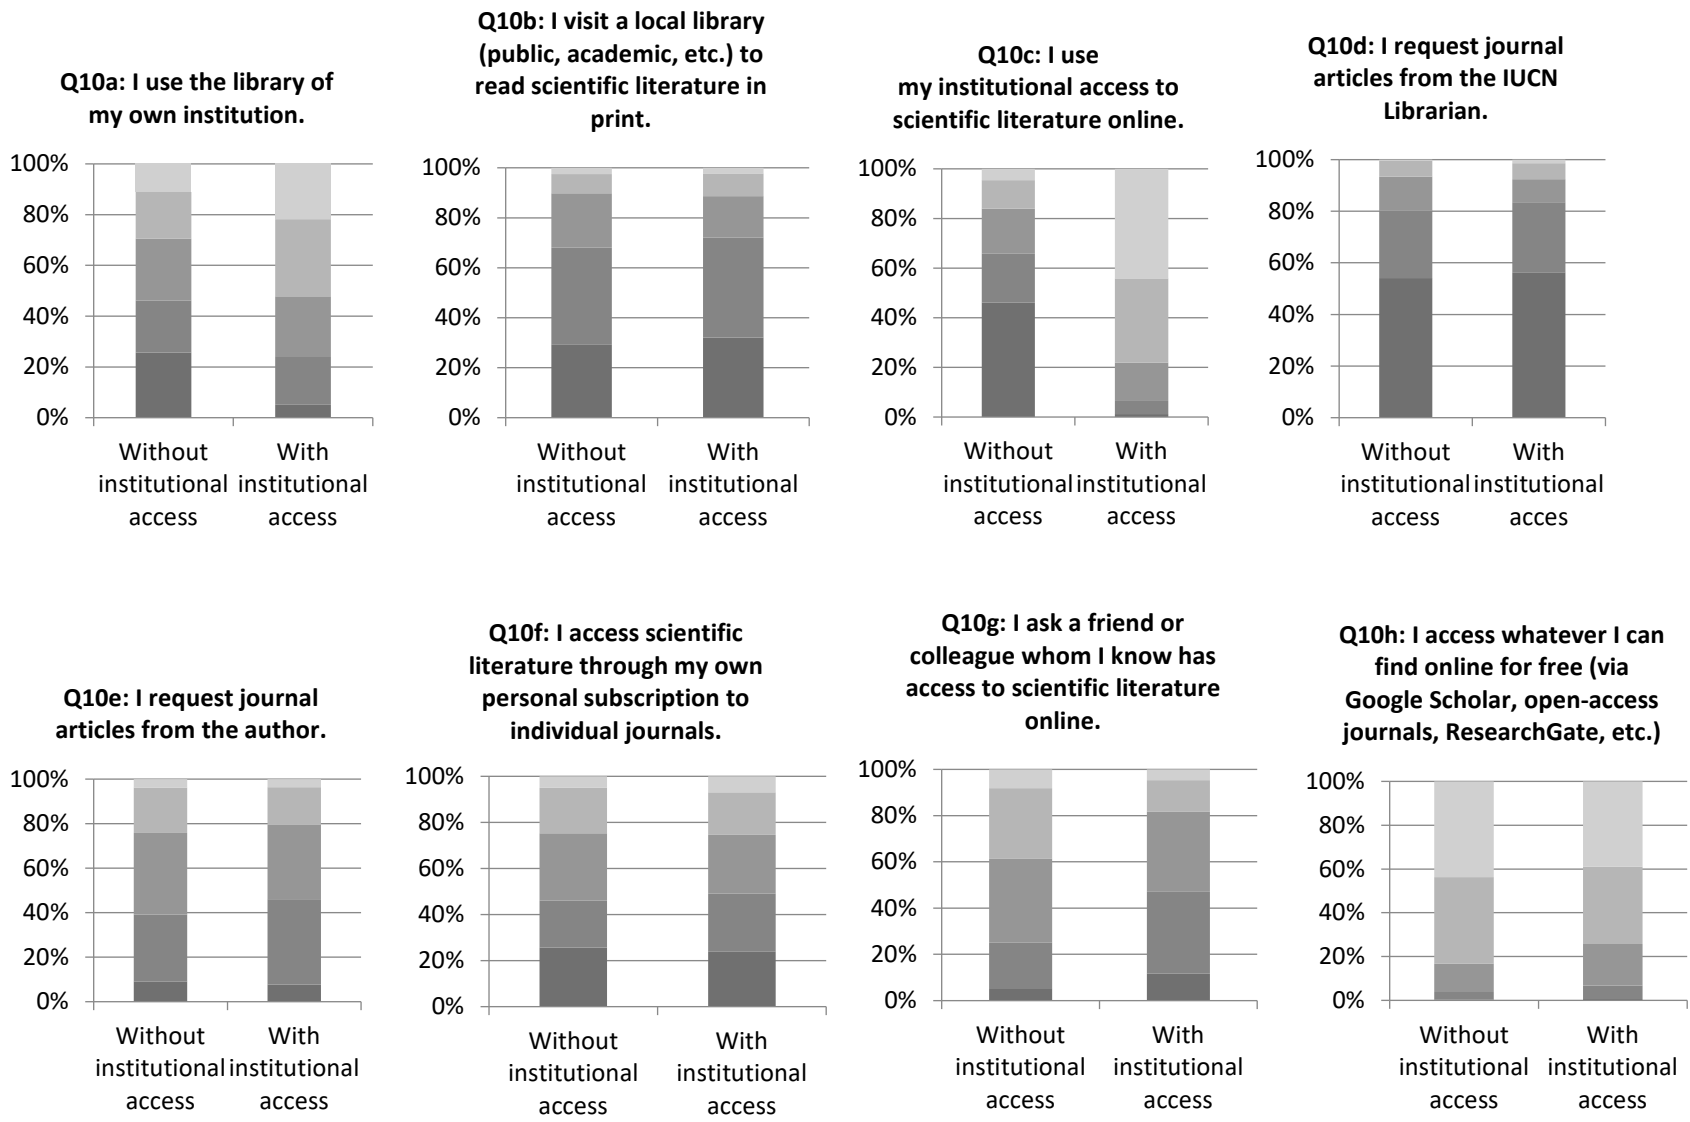

Figure 11 Frequency of accessing literature through various information pathways among respondents with and without institutional access (n = 2,004). From light to dark grey: very frequently (daily); frequently (once a week); sometimes (once a month); infrequently; never or not available.

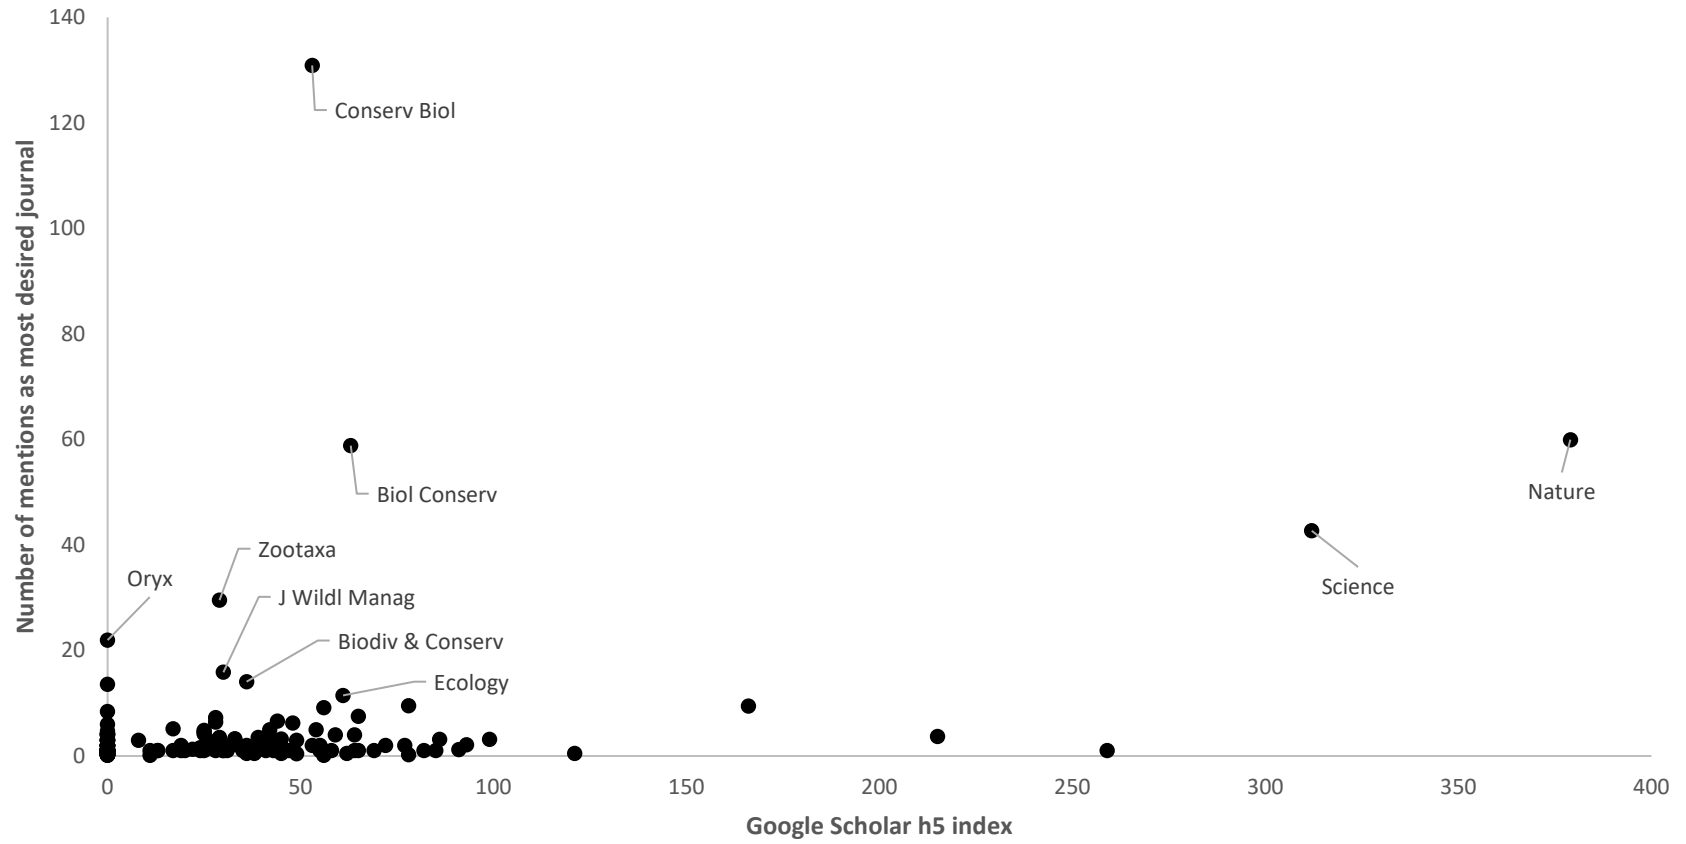

Figure 12 Relationship between “most desired” journals and Google Scholar h5 index of these journals (n = 235).
